# Supplementary material
Source: Royal Society of Chemistry journal article supplement (doi:10.1039/d6nj00370b)
Supplement: d6nj00370b1.pdf [file d6nj00370b1.pdf]

# Aminoazine-Based Unsymmetric Multidentate Ligands in Mn(II & I) Complexes and Application in Hydrophosphination Reactions

Aabid A. Wani,<sup>a, b, c</sup> Shivkanya M. Bhujbal,<sup>b</sup> Kriti Mehta,<sup>b</sup> Sumit S. Chourasiya,<sup>b</sup> Deepika Kathuria,<sup>d</sup> Michael Wörle,<sup>c</sup> Hansjörg Grützmacher,<sup>e†</sup> Prasad V. Bharatam<sup>b†</sup>

<sup>a</sup> School of Pharmacy, GITAM University, Rudraram, Telangana 502329, India.

<sup>b</sup> Department of Medicinal Chemistry, National Institute of Pharmaceutical Education and Research (NIPER), Sector 67, S.A.S. Nagar, Punjab 160062, India.

<sup>c</sup> Department of Chemistry and Applied Biosciences, ETH Zürich, Vladimir-Prelog-Weg 1, CH-8093 Zurich, Switzerland.

<sup>d</sup> Chandigarh College of Pharmacy, Chandigarh, Punjab, India.

<sup>e</sup> LIFM, IGCME, School of Chemistry, Sun Yat-Sen University, 510006 Guangzhou, China.

E-mail: [pvbharatam@niper.ac.in](mailto:pvbharatam@niper.ac.in)

E-mail: [hgruetzmacher@ethz.ch](mailto:hgruetzmacher@ethz.ch)

## Contents

|                                                                                                     |           |
|-----------------------------------------------------------------------------------------------------|-----------|
| <b>1.0 Experimental Section</b> .....                                                               | <b>2</b>  |
| 1.1 Chemistry.....                                                                                  | 2         |
| 1.2 Computational Methods.....                                                                      | 2         |
| <b>2.0 General Procedures of Synthesis</b> .....                                                    | <b>2</b>  |
| Synthesis of 4-pyridyl-4-methyl-1,1-diaminoazine (L1): .....                                        | 2         |
| Synthesis of 4-pyridyl-1, 4-dimethylaminoazine (L2):.....                                           | 3         |
| General Procedure for the synthesis of complex C1, C2, and C3.....                                  | 3         |
| General procedure for the hydrophosphination of alkenes: .....                                      | 4         |
| Control experiments:.....                                                                           | 5         |
| <b>3.0 Spectral Data:</b> .....                                                                     | <b>5</b>  |
| <b>4.0 UV and IR spectra of the complexes C1, and C2</b> .....                                      | <b>8</b>  |
| <b>5.0 Crystal Structures details of Complex C1, C2, and C3</b> .....                               | <b>9</b>  |
| 5.1 Crystal Structures details of Complex C1 .....                                                  | 10        |
| 5.2 Crystal Structures details of Complex C2.....                                                   | 14        |
| 5.3 Crystal Structures details of Complex C3 .....                                                  | 19        |
| <b>6.0 <sup>1</sup>H and <sup>13</sup>C NMR spectra of synthesized compounds:</b> .....             | <b>22</b> |
| <b>7.0 The 3D structures and coordinates of the optimized reactant, intermediates, and products</b> | <b>36</b> |
| <b>8. ORTEP diagrams:</b> .....                                                                     | <b>49</b> |
| <b>9.0 References:</b> .....                                                                        | <b>51</b> |

## 1.0 Experimental Section

### 1.1 Chemistry

The reagents and chemicals required for the study were procured, and all reagents were used as received unless otherwise noted. The progress of the reaction was monitored by Thin Layer Chromatography (TLC) on silica gel aluminum plates, with visualization under UV light.  $^1\text{H}$  NMR and  $^{13}\text{C}$  NMR spectra were recorded at 300 MHz and 75 MHz, respectively, with TMS as an internal standard. The  $^1\text{H}$  NMR and  $^{13}\text{C}$  NMR spectra were recorded in  $\text{CD}_2\text{Cl}_2$  and, for a few compounds, in  $\text{DMSO-}d_6$  at 2.50 ppm and 39.51 ppm, respectively. Chemical shifts ( $\delta$ ) are reported in parts per million (ppm). Coupling constants (J) are reported in hertz (Hz). The abbreviations used to characterize the signals are as follows: s = singlet, m = multiplet, d = doublet, br. s. = broad singlet, dd = doublet of doublets, t = triplet, and coupling constant in Hz. Infrared spectra were recorded using a Perkin-Elmer Spectrum One FT-IR spectrometer, either as thin films on KBr plates. High-resolution mass spectra (HRMS) were recorded using the ESI-TOF method.

### 1.2 Computational Methods

The quantum chemical calculations were carried out using the Gaussian 16 program.<sup>1</sup> Geometries of C, H, N, O, and P were optimized using the PBE0-PBE1 functional<sup>2</sup> and the def2-TZVP<sup>3</sup> basis set, whereas for Manganese, Lan12dz<sup>4</sup>. Solvent effects were considered implicitly using the SMD<sup>5</sup> method with toluene as solvent. The nature of each stationary point was confirmed by frequency calculations (no imaginary frequencies for minima and one for transition state structures). The frequency calculations were carried out on all the structures to verify the character of the stationary points (minima v/s saddle points).

## 2.0 General Procedures of Synthesis

### Synthesis of 4-pyridyl-4-methyl-1,1-diaminoazine (L1):

Through a single-step process, a non-palindromic NNN-pincer ligand was successfully synthesized using a combination of 2-acetylpyridylcarboxaldehyde (0.5g, 4.13 mmol) and aminoguanidine hydrochloride (0.455g, 4.13 mmol) in water (5 mL) at room temperature with the aid of 1N NaOH solution (1 mL). The resulting ligand, 4-pyridyl-4-methyl-1,1-

diaminoazine (**L1**), was isolated as a light brown solid in an 85% yield, following a cost-effective and environmentally friendly procedure (Scheme 1). The chemical structure of the ligand was confirmed through various spectroscopic techniques, including  $^1\text{H}$  NMR,  $^{13}\text{C}$  NMR, IR, and mass spectrometry. Notably, the  $^1\text{H}$  NMR spectrum displayed distinct peaks for the methyl and  $-\text{NH}_2$  groups, further validating the successful synthesis of the ligand (**L1**).

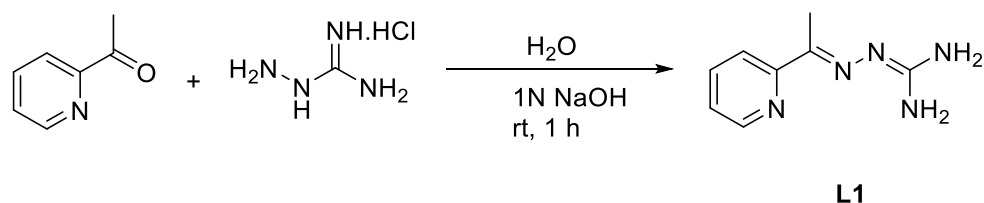

**Scheme S1.** Synthesis of non-palindromic NNN-pincer ligand (**L1**).

### Synthesis of 4-pyridyl-1, 4-dimethylaminoazine (**L2**):

A solution of acetamidine hydrochloride (1.0g, 10 mmol) in MeOH (10 ml) was cooled in an ice bath, and then hydrazine hydrate (0.530g, 0.52 ml, 10 mmol) was added, the mixture was stirred for 24 h, giving rise to an intense red solution. The solution was then concentrated in a vacuum, giving rise to red coloured acetamidrazone hydrochloride (hygroscopic in nature). The acetamidrazone (0.939g, 12.86 mmol) was then reacted with 2-acetylpyridine (1.71g, 14.14 mmol) in MeOH, refluxed at 60 °C for 12 h. The solution was concentrated, and the greenish solid was neutralised with saturated sodium carbonate solution by performing DCM/Water workup to yield the desired ligand (**L2**) (Scheme 2).

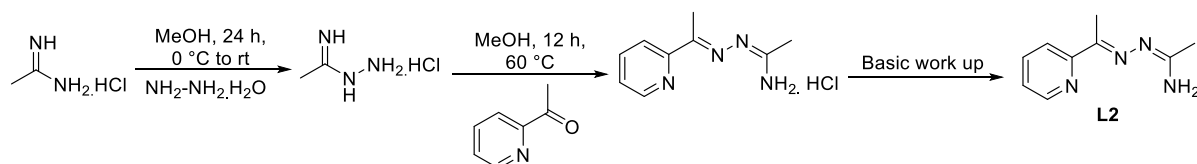

**Scheme S2.** Synthesis of non-palindromic NNN-pincer ligand (**L2**).

### General Procedure for the synthesis of complex C1, C2, and C3

The synthesis of pincer complexes **C1** and **C2** was performed in a single step. In a 50 mL RBF, pyridyl azine **L1** (1 mmol) and anhydrous  $\text{MnCl}_2$  (1 mmol) were added in dry THF (10 mL) at room temperature. The resulting reaction mixture was stirred at room temperature for 12 hours, affording a light brown precipitate of complex **C1** in 90% yield (Scheme S1a). X-ray diffraction analysis revealed **C1** as a pentacoordinated complex with a trigonal bipyramidal geometry and a 15-electron count, indicating stronger bonding of the guanidine portion than of the pyridine ring.

Similarly, the synthesis of complex **C2** was carried out using the above-mentioned procedure with manganese acetate as a precursor and characterized with X-ray crystallography, a hexa-coordinated complex with octahedral geometry and a 17-electron count.

In a 50 ml Schlenk flask, **L2** (0.35 g, 2 mmol),  $\text{Mn}(\text{CO})_5\text{Br}$  (0.537 g, 1.92 mmol), and 10 ml dry toluene were mixed under an argon atmosphere. The reaction mixture was stirred at 80 °C for 12 h. A light-yellow precipitate was formed, which was washed with 50 ml (2x20 ml and 1x10 ml) of dry hexane and decanted using a cannula. The solid was then dried under vacuum to obtain the desired complex **C3**. Yield 90%. The crystals suitable for X-ray diffraction were obtained from a methanol-diethyl ether solvent system (slow diffusion technique). The solid-state structure shows that **C3** is a hexa-coordinated complex with octahedral geometry, and it is an 18-electron complex. The nitrogen from the guanidine portion do not form a bond with the central metal atom, hence serves as a bidentate ligand under given reaction conditions as shown below (Scheme S3).

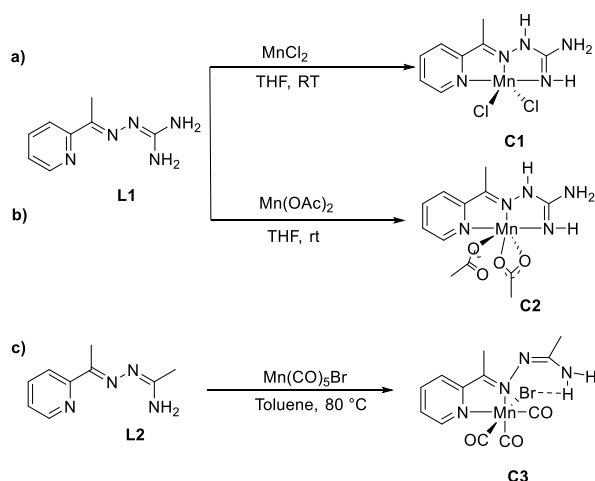

**Scheme S3.** Synthesis of **C1**, **C2** -Mn(II) and **C3** -Mn(I) aminoazine complexes. All these reactions were performed under inert conditions

### General procedure for the hydrophosphination of alkenes:

In toluene (1 ml), complex **C1** (2 mol%, 3 mg), and *t*-BuOK (4 mol%, 2.3 mg) were added. The reaction mixture was stirred for 5 minutes, turning light greenish. Subsequently, cinnamitrile (0.5 mmol, 64 mg) was added to the mixture, resulting in a deep red colour change, followed by the addition of diphenylphosphine (0.5 mmol, 93 mg). The reaction was carried out at room temperature under an argon atmosphere for one hour and monitored using  $^{31}\text{P}\{^1\text{H}\}$  NMR. Upon completion of the reaction, the mixture was diluted with 10 times its volume of dry hexane, leading to the precipitation of the product. The mixture was then filtered through a silica pad in a glass pipette saturated with hexane to separate unreacted starting

materials. The silica bed was washed with additional hexane (3 mL), followed by passing dichloromethane through the silica bed. The resulting solution was collected in a second vial for further processing. The solvent was evaporated under reduced pressure, and the pure product was utilized for further analysis.

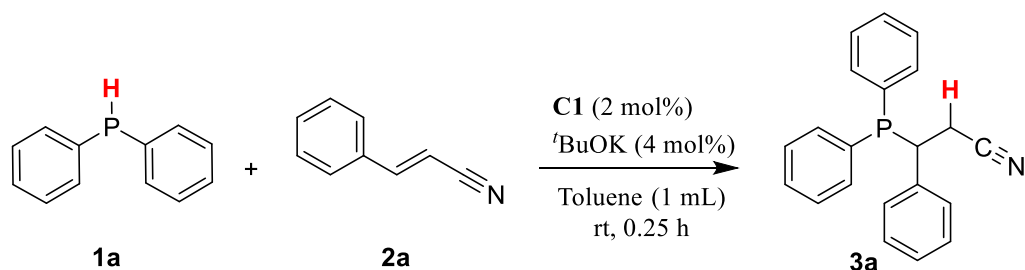

**Scheme S1:** Synthesis of 3-(diphenylphosphanyl)-3-phenylpropanenitrile using complex **C1**.

### Control experiments:

1. **In the absence of base:** In this experiment, no catalysis was observed, which shows that base is important for hydrophosphination reactions.
2. **In the presence of reducing agent (Sodium borohydride):** It was believed that NaBH<sub>4</sub> shall reduce Mn(II) to Mn(I), which would help in catalysis and the scope of the reaction. However, there was no reaction. This experiment further adds to the importance of the base in the reaction.
3. **Addition of PPh<sub>3</sub> to the optimised reaction condition:** Most of the catalysts for the hydrophosphination reactions are phosphorus-based complexes. Hence, it seems that phosphine is necessary for such reactions. 1 equivalent of PPh<sub>3</sub> was added to the optimised condition; however, no significant improvement was observed.
4. **In the presence of base only:** In this experiment, no catalysis was observed, which shows that the manganese complex is important for hydrophosphination reactions.
5. **Sequence of addition after catalyst activation:** Addition of Cinnamitrile before the diphenylphosphine would slow down the reaction rate. Hence, it is believed that coordination of diphenylphosphine to manganese accelerates the reaction, as it acts as a phosphide donor.

## 3.0 Spectral Data:

### 1,1-diaminopyridylazine (L1):

$^1\text{H}$  NMR (300 MHz, DMSO-*d*6)  $\delta$  8.49-8.48 (d,  $J$  = 8.0 Hz, 1H), 8.23-8.21 (d,  $J$  = 8.0 Hz, 1H), 7.68-7.65 (t,  $J$  = 7.6 Hz, 1H), 7.22-7.19 (t,  $J$  = 7.2 Hz, 1H), 6.03 (brs, 2H), 5.68 (brs, 2H), 2.27 (s, 3H);  $^{13}\text{C}$  NMR (75 MHz, DMSO-*d*6);  $\delta$  160.81, 148.98, 148.59, 135.93, 122.38, 120.00, 12.85; IR (KBr,  $\text{cm}^{-1}$ ): 3458 (NH), 1659 (C=N), 1609 (C=N). HRMS (EI-TOF) calcd for  $\text{C}_8\text{H}_{12}\text{N}_5$   $[\text{M}+\text{H}]^+$ : 178.1087, found 178.1088.

**(Pyridin-2-yl-ethylidene)acetohydrazoneamide (L2):**

$^1\text{H}$  NMR (300 MHz, DMSO-*d*6)  $\delta$ : 8.56-8.55 (d,  $J$  = 8.0 Hz, 1H), 8.33-8.30 (d,  $J$  = 8.0 Hz, 1H), 7.77-7.74 (t,  $J$  = 7.6 Hz, 1H), 7.35-7.31 (t,  $J$  = 7.2 Hz, 1H), 6.6 (brs, 2H), 2.27 (s, 3H), 1.94 (s, 3H);  $^{13}\text{C}$  NMR (75 MHz, DMSO-*d*6);  $\delta$  163.24, 158.86, 153.35, 148.67, 136.78, 125.25, 121.86, 16.32, 14.02; IR (KBr,  $\text{cm}^{-1}$ ): 3458 (NH), 1659 (C=N), 1609 (C=N). HRMS (EI-TOF) calcd for  $\text{C}_8\text{H}_{12}\text{N}_5$   $[\text{M}+\text{H}]^+$ : 176.2230, found 176.2231.

**Spectral data of hydrophosphination products:**

**1. 3-(diphenylphosphaneyl)-3-phenylpropanenitrile<sup>6</sup>**

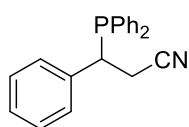

$^1\text{H}$  NMR (300 MHz,  $\text{CD}_2\text{Cl}_2$ )  $\delta$  = 7.66 – 7.63 (m, 2H), 7.47 – 7.45 (m, 3H), 7.31 – 7.29 (m, 4H), 7.26 – 7.16 (m, 6H), 3.79 – 3.75 (m, 1H), 2.75 – 2.68 (m, 1H), 2.66 – 2.60 (m, 1H).  $^{13}\text{C}$  NMR (75 MHz,  $\text{CD}_2\text{Cl}_2$ )  $\delta$  = 134.4 (d,  $J$  = 21.4 Hz), 133.5 (d,  $J$  = 19.0 Hz), 130.5, 129.5, 129.4 (d,  $J$  = 3.2 Hz), 129.2, 129.2, 128.6 (d,  $J$  = 6.9 Hz), 127.9, 42.0 (d,  $J$  = 15.5 Hz), 23.2 (d,  $J$  = 23.0 Hz).  $^{31}\text{P}$  NMR (121 MHz,  $\text{CD}_2\text{Cl}_2$ )  $\delta$  = -1.95 (s). HRMS (ESI) calcd for  $[\text{C}_{21}\text{H}_{18}\text{NP}]^+$ : 315.12  $[\text{M}]^+$ ; found: 315.13.

**2. 3-(diphenylphosphaneyl)-3-phenylpropanal<sup>6</sup>**

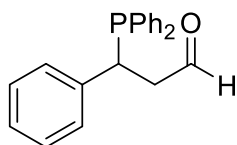

$^1\text{H}$  NMR (300 MHz,  $\text{CD}_2\text{Cl}_2$ )  $\delta$  = 9.54 – 9.52 (m, 1H), 7.66 – 7.61 (m, 2H), 7.43 – 7.42 (m, 3H), 7.24 – 7.12 (m, 10H), 4.14 – 4.09 (m, 1H), 3.05 – 2.96 (m, 1H), 2.70 – 2.62 (m, 1H).  $^{13}\text{C}$  NMR (75 MHz,  $\text{CD}_2\text{Cl}_2$ )  $\delta$  = 200.7 (d,  $J$  = 12.6 Hz), 140.7 (d,  $J$  = 8.7 Hz), 136.5 (d,  $J$  = 17.1 Hz), 134.4 (d,  $J$  = 20.9 Hz), 133.7 (d,  $J$  = 19.0 Hz), 130.0, 129.4 (d,  $J$  = 7.7 Hz), 129.2 (d,  $J$  = 7.8 Hz), 128.8, 128.5 (d,  $J$  = 6.8 Hz), 127.0 (d,  $J$  = 2.2 Hz), 47.7 (d,  $J$  = 20.4 Hz), 39.0 (d,  $J$  = 14.0 Hz).  $^{31}\text{P}$  NMR (121 MHz,  $\text{CD}_2\text{Cl}_2$ )  $\delta$  = -0.60. HRMS (ESI) calcd for  $[\text{C}_{21}\text{H}_{19}\text{OP}]^+$ : 318.12  $[\text{M}]^+$ ; found: 318.13.

**3. 4-(diphenylphosphaneyl)-4-phenylbutan-2-one<sup>6</sup>**

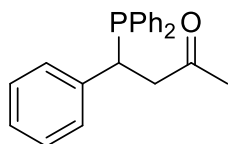

**<sup>1</sup>H NMR (300 MHz, CD<sub>2</sub>Cl<sub>2</sub>)**  $\delta$  = 7.67 – 7.62 (m, 2H), 7.44 – 7.41 (m, 3H), 7.24 – 7.09 (m, 10H), 4.13 – 4.09 (m, 1H), 3.09 – 3.03 (m, 1H), 2.67 – 2.62 (m, 1H), 1.88 (s, 3H). **<sup>13</sup>C NMR (75 MHz, CD<sub>2</sub>Cl<sub>2</sub>)**  $\delta$  = 206.6, 141.2 (d,  $J$  = 8.6 Hz), 136.7 (d,  $J$  = 16.6 Hz), 134.3 (d,  $J$  = 23.5 Hz), 133.6 (d,  $J$  = 16.6 Hz), 129.9, 129.3 (d,  $J$  = 8.1 Hz), 129.0 (t,  $J$  = 7.0 Hz), 128.5, 128.3 (d,  $J$  = 6.9 Hz), 126.6, 47.3 (d,  $J$  = 21.2 Hz), 136.7 (d,  $J$  = 16.6 Hz), 39.8 (d,  $J$  = 11.6 Hz), 30.8. **<sup>31</sup>P NMR (121 MHz, CD<sub>2</sub>Cl<sub>2</sub>)**  $\delta$  = -0.97 (s). HRMS (ESI) calcd for [C<sub>22</sub>H<sub>21</sub>OP]<sup>+</sup>: 332.13 [M]<sup>+</sup>; found: 332.13.

#### 4. Phenethyldiphenylphosphane<sup>6</sup>

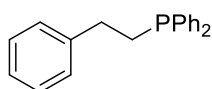

**<sup>1</sup>H NMR (300 MHz, CD<sub>2</sub>Cl<sub>2</sub>)**  $\delta$  = 7.39 – 7.31 (m, 4H), 7.29 – 7.21 (m, 6H), 7.20 – 7.14 (m, 2H), 7.10 – 7.04 (m, 3H), 2.66 – 2.58 (m, 2H), 2.30 – 2.24 (m, 2H). **<sup>13</sup>C NMR (75 MHz, CD<sub>2</sub>Cl<sub>2</sub>)**  $\delta$  = 143.17 (d,  $J$  = 12.8 Hz), 139.2 (d,  $J$  = 13.8 Hz), 134.3 (d,  $J$  = 16.8 Hz), 133.1 (d,  $J$  = 18.7 Hz), 128.9 (d,  $J$  = 10.0 Hz), 128.8 (d,  $J$  = 5.3 Hz), 128.6, 126.4, 32.54 (d,  $J$  = 18.1 Hz), 30.45 (d,  $J$  = 13.0 Hz). **<sup>31</sup>P NMR (121 MHz, CD<sub>2</sub>Cl<sub>2</sub>)**  $\delta$  = -16.2 (s). HRMS (ESI) calcd for [C<sub>20</sub>H<sub>19</sub>P]<sup>+</sup>: 290.12 [M]<sup>+</sup>; found: 290.13.

#### 5. 2-(2-(diphenylphosphaneyl)ethyl)pyridine<sup>6</sup>

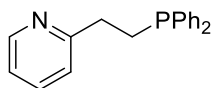

**<sup>1</sup>H NMR (300 MHz, CD<sub>2</sub>Cl<sub>2</sub>)**  $\delta$  = 8.51 – 8.49 (m, 1H), 7.59 – 7.56 (m, 4H), 7.49 – 7.46 (m, 6H), 7.38 – 7.32 (m, 6H), 7.13 – 7.09 (m, 2H), 2.90 – 2.85 (m, 2H), 2.52 – 2.49 (m, 2H). **<sup>13</sup>C NMR (75 MHz, CD<sub>2</sub>Cl<sub>2</sub>)**  $\delta$  = 149.6, 139.2, 136.5, 133.1 (d,  $J$  = 18.5 Hz), 122.9, 121.5, 34.8 (d,  $J$  = 18.3 Hz), 28.2 (d,  $J$  = 13.9 Hz). **<sup>31</sup>P NMR (121 MHz, CD<sub>2</sub>Cl<sub>2</sub>)**  $\delta$  = -15.89 (s). HRMS (ESI) calcd for [C<sub>19</sub>H<sub>18</sub>NP]<sup>+</sup>: 291.12 [M]<sup>+</sup>; found: 291.13.

#### 6. 3-(diphenylphosphaneyl)cyclohexan-1-one<sup>6</sup>

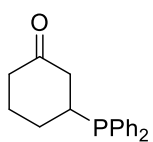

**<sup>1</sup>H NMR (300 MHz, CD<sub>2</sub>Cl<sub>2</sub>)**  $\delta$  = 7.52 – 7.45 (m, 4H), 7.40 – 7.31 (m, 6H), 2.72 – 2.62z (m, 1H), 2.37 – 2.29 (m, 1H), 2.27 – 2.21 (m, 1H), 2.18 2.10 (m, 1H), 1.90 – 1.84 (m, 1H), 1.80 – 1.68 (m, 1H), 1.62 – 1.51 (m, 1H), 1.5 (s, 1H). **<sup>13</sup>C NMR (75 MHz, CD<sub>2</sub>Cl<sub>2</sub>)**  $\delta$  = 210.0 (d,  $J$  = 12.0 Hz), 136.7 (d,  $J$  = 14.6 Hz), 136.1 (d,  $J$  = 14.3 Hz), 133.9 (m), 129.5 (d,  $J$  = 15.5 Hz), 128.9 (d,  $J$  = 7.1 Hz), 44.5 (d,  $J$  = 14.8 Hz), 36.3 (d,  $J$  = 12.6 Hz), 31.5, 28.5 (d,  $J$  = 16.3 Hz), 27.1 (d,  $J$  = 12.5 Hz). **<sup>31</sup>P NMR (121 MHz, CD<sub>2</sub>Cl<sub>2</sub>)**  $\delta$  = -4.1 (s). HRMS (ESI) calcd for [C<sub>18</sub>H<sub>19</sub>OP]<sup>+</sup>: 282.12 [M]<sup>+</sup>; found: 282.13

## 4.0 UV and IR spectra of the complexes C1, and C2

UV-Spectrum of complexes shows a weak band at 420 nm, which corresponds to the Metal-Ligand transfer process (though weak in **C1** and **C2**). This study reveals that amino-azine ligands are weak field ligands; thus, the gap between  $t_{2g}$  and  $e_g$ , energy levels stays less than the pairing energy. Thus, electrons do not prefer pairing. This makes the complexes **C1** and **C2**  $d^5$  high-spin complexes. Hence, the expected magnetic moment for **C1** and **C2** is  $\mu_{\text{eff}} \approx 5.29$  (Bm). It is also known that Mn (II) complexes with Schiff bases prefer to be  $d^5$  high-spin complexes.

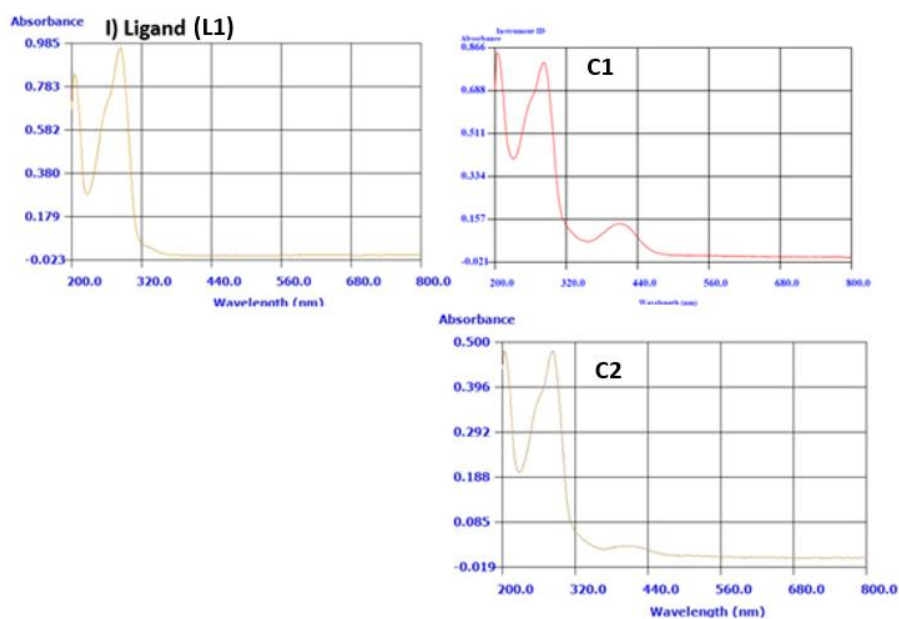

**Figure S1:** UV spectra of azine ligand (**L1**) and its complexes **C1** and **C2**.

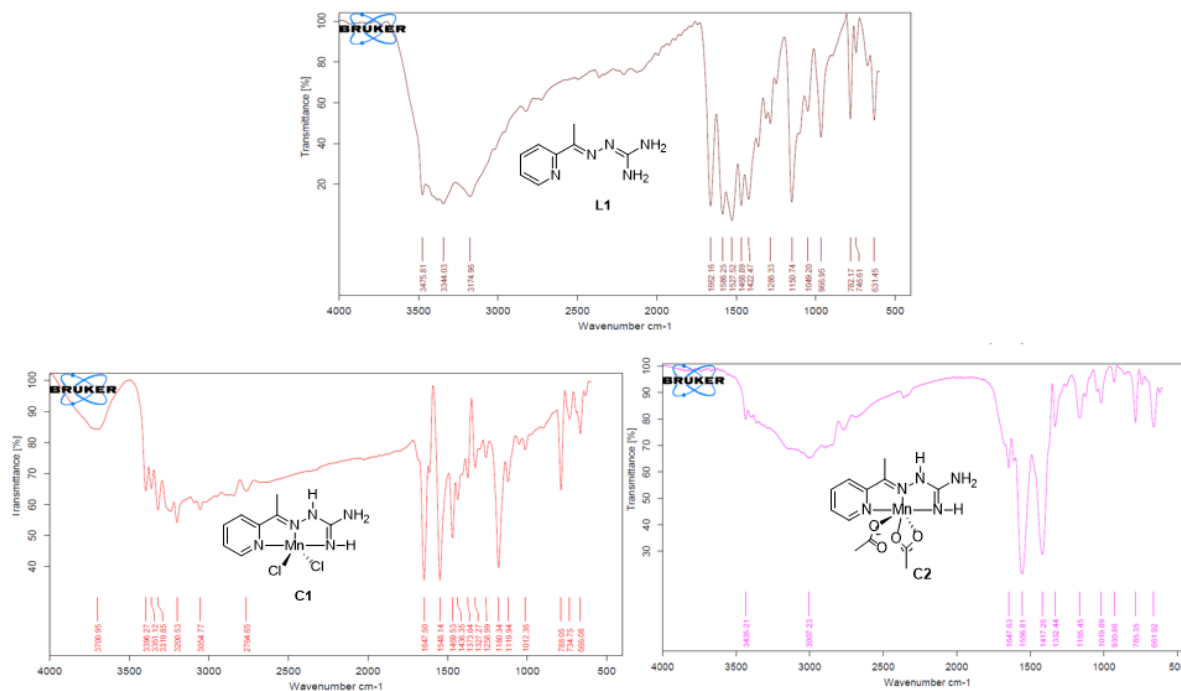

Figure S2: IR-spectra of ligand L1 and its complex C1.

## 5.0 Crystal Structures details of Complex C1, C2, and C3

X-ray diffraction experiments were performed on a Rigaku XtaLAB Synergy-S diffractometer, equipped with a HyPix-6000HE hybrid photon counting detector, using a microfocus tube (Cu,  $\lambda = 1.54184 \text{ \AA}$ ). Suitable crystals were covered with polybutene oil, selected using a microscope using polarized light, transferred on a MiTeGen MicroMount and mounted under a cold nitrogen stream. Data-sets were collected at 100 K. The data collection and reduction were performed using the Rigaku CrysAlisPro Software.<sup>7</sup> Structure solution and refinement were performed with SHELXT<sup>8</sup> and SHELXL,<sup>9</sup> respectively, embedded in Olex2.<sup>10</sup> All atoms heavier than hydrogen were refined with anisotropic displacement parameters, while hydrogen atoms attached to carbon atoms were placed at calculated positions and were refined according to the riding model. All hydrogen atoms attached to the nitrogen atoms were found in the Difference Fourier Map and refined freely.

## 5.1 Crystal Structures details of Complex C1

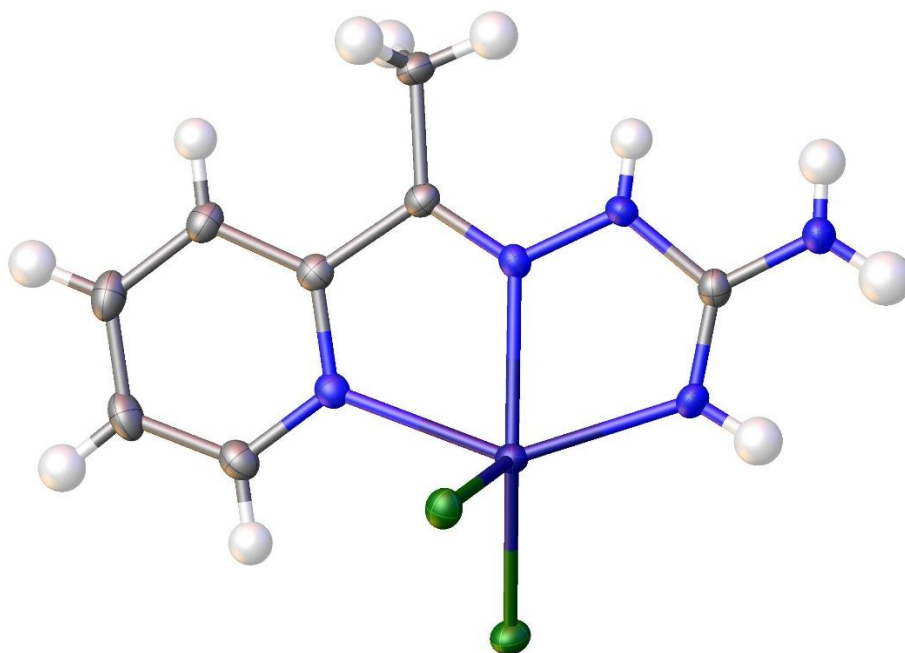

Figure S3: Molecular structure of complex 1 with displacement ellipsoids drawn at 50 % probability level. (C in grey, H in white, N in blue, Mn in dark blue, Cl in green). All hydrogen atoms attached to the nitrogen atoms were found in the Difference Fourier Map and refined freely.

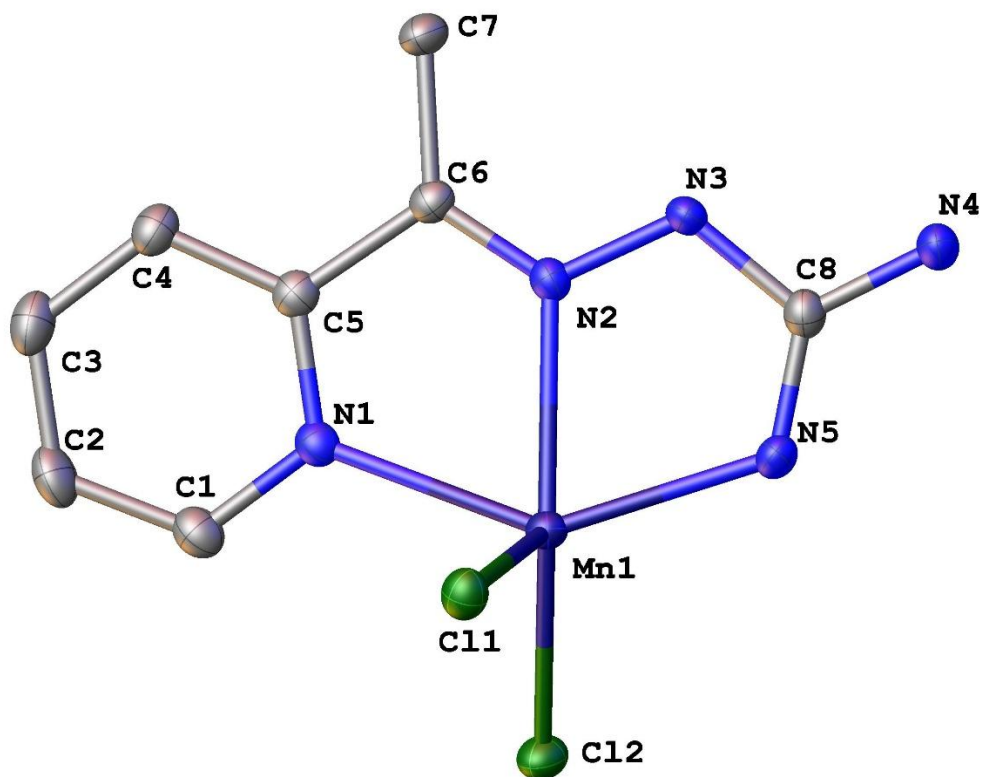

Figure S4: Molecular structure of complex 1 with displacement ellipsoids drawn at 50 % probability level. H atoms are omitted for clarity (C in grey, N in blue, Mn in dark blue, Cl in green).

**Table 1.** Crystal data and structure refinement for **C1** (CCDC 2348863).

|                                             |                                                                 |
|---------------------------------------------|-----------------------------------------------------------------|
| Identification code                         | AA-3-2_auto                                                     |
| Empirical formula                           | C <sub>8</sub> H <sub>11</sub> Cl <sub>2</sub> MnN <sub>5</sub> |
| Formula weight                              | 303.06                                                          |
| Temperature/K                               | 100.00(10)                                                      |
| Crystal system                              | monoclinic                                                      |
| Space group                                 | <i>P2<sub>1</sub>/n</i>                                         |
| a/Å                                         | 6.62890(10)                                                     |
| b/Å                                         | 15.5631(2)                                                      |
| c/Å                                         | 11.48390(10)                                                    |
| α/°                                         | 90                                                              |
| β/°                                         | 92.2570(10)                                                     |
| γ/°                                         | 90                                                              |
| Volume/Å <sup>3</sup>                       | 1183.83(3)                                                      |
| Z                                           | 4                                                               |
| ρ <sub>calc</sub> /cm <sup>3</sup>          | 1.700                                                           |
| μ/mm <sup>-1</sup>                          | 13.067                                                          |
| F(000)                                      | 612.0                                                           |
| Crystal size/mm <sup>3</sup>                | 0.226 × 0.115 × 0.084                                           |
| Radiation                                   | Cu Kα (λ = 1.54184)                                             |
| 2θ range for data collection/°              | 9.576 to 153.59                                                 |
| Index ranges                                | -8 ≤ h ≤ 8, -18 ≤ k ≤ 19, -14 ≤ l ≤ 13                          |
| Reflections collected                       | 14177                                                           |
| Independent reflections                     | 2382 [R <sub>int</sub> = 0.0336, R <sub>sigma</sub> = 0.0212]   |
| Data/restraints/parameters                  | 2382/0/162                                                      |
| Goodness-of-fit on F <sup>2</sup>           | 1.084                                                           |
| Final R indexes [I ≥ 2σ (I)]                | R <sub>1</sub> = 0.0224, wR <sub>2</sub> = 0.0586               |
| Final R indexes [all data]                  | R <sub>1</sub> = 0.0239, wR <sub>2</sub> = 0.0593               |
| Largest diff. peak/hole / e Å <sup>-3</sup> | 0.36/-0.29                                                      |

**Table 2.** Fractional Atomic Coordinates ( $\times 10^4$ ) and Equivalent Isotropic Displacement Parameters ( $\text{\AA}^2 \times 10^3$ ) for AA-3-2\_auto.  $U_{\text{eq}}$  is defined as 1/3 of the trace of the orthogonalised  $U_{ij}$  tensor.

| Atom | <i>x</i>  | <i>y</i>   | <i>z</i>   | $U(\text{eq})$ |
|------|-----------|------------|------------|----------------|
| Mn1  | 2935.7(4) | 6397.1(2)  | 6756.1(2)  | 15.81(9)       |
| C11  | 4124.6(6) | 6450.0(2)  | 8770.1(3)  | 20.93(10)      |
| C12  | 542.5(6)  | 5268.6(2)  | 6646.6(4)  | 22.09(11)      |
| N1   | 711(2)    | 7501.0(9)  | 6950.8(12) | 17.8(3)        |
| N2   | 4028(2)   | 7574.2(9)  | 5846.5(11) | 16.9(3)        |
| N3   | 5743(2)   | 7460.5(9)  | 5253.3(12) | 19.0(3)        |
| N4   | 8064(2)   | 6535.1(11) | 4554.4(14) | 23.8(3)        |
| N5   | 5444(2)   | 6030.6(9)  | 5720.6(13) | 20.5(3)        |
| C1   | -981(3)   | 7441.7(12) | 7547.7(15) | 22.3(3)        |
| C2   | -2134(3)  | 8152.6(13) | 7816.8(16) | 26.1(4)        |
| C3   | -1532(3)  | 8954.6(12) | 7455.4(16) | 25.9(4)        |
| C4   | 204(3)    | 9026.1(11) | 6822.6(15) | 21.1(3)        |
| C5   | 1292(2)   | 8286.6(11) | 6589.3(14) | 18.0(3)        |
| C6   | 3165(2)   | 8309.9(10) | 5922.3(14) | 17.0(3)        |
| C7   | 3876(3)   | 9131.6(10) | 5409.0(16) | 21.6(3)        |
| C8   | 6428(2)   | 6627.0(11) | 5186.6(14) | 18.8(3)        |

**Table 3.** Bond Lengths for AA-3-2\_auto.

| Atom | Atom | Length/ $\text{\AA}$ | Atom | Atom | Length/ $\text{\AA}$ |
|------|------|----------------------|------|------|----------------------|
| Mn1  | C11  | 2.4153(4)            | N3   | C8   | 1.378(2)             |
| Mn1  | C12  | 2.3668(4)            | N4   | C8   | 1.337(2)             |
| Mn1  | N1   | 2.2810(14)           | N5   | C8   | 1.302(2)             |
| Mn1  | N2   | 2.2430(14)           | C1   | C2   | 1.387(3)             |
| Mn1  | N5   | 2.1587(15)           | C2   | C3   | 1.379(3)             |
| N1   | C1   | 1.340(2)             | C3   | C4   | 1.389(3)             |
| N1   | C5   | 1.352(2)             | C4   | C5   | 1.390(2)             |
| N2   | N3   | 1.3595(19)           | C5   | C6   | 1.485(2)             |
| N2   | C6   | 1.285(2)             | C6   | C7   | 1.492(2)             |

**Table 4.** Bond Angles for AA-3-2\_auto.

| <b>Atom</b> | <b>Atom</b> | <b>Atom</b> | <b>Angle/°</b> | <b>Atom</b> | <b>Atom</b> | <b>Atom</b> | <b>Angle/°</b> |
|-------------|-------------|-------------|----------------|-------------|-------------|-------------|----------------|
| C12         | Mn1         | C11         | 105.598(16)    | N2          | N3          | C8          | 115.74(14)     |
| N1          | Mn1         | C11         | 93.91(4)       | C8          | N5          | Mn1         | 118.83(12)     |
| N1          | Mn1         | C12         | 97.44(4)       | N1          | C1          | C2          | 122.59(17)     |
| N2          | Mn1         | C11         | 108.60(4)      | C3          | C2          | C1          | 119.12(17)     |
| N2          | Mn1         | C12         | 144.04(4)      | C2          | C3          | C4          | 119.02(17)     |
| N2          | Mn1         | N1          | 69.66(5)       | C3          | C4          | C5          | 118.77(17)     |
| N5          | Mn1         | C11         | 107.89(4)      | N1          | C5          | C4          | 122.22(16)     |
| N5          | Mn1         | C12         | 107.69(4)      | N1          | C5          | C6          | 115.76(14)     |
| N5          | Mn1         | N1          | 140.18(5)      | C4          | C5          | C6          | 122.01(15)     |
| N5          | Mn1         | N2          | 71.91(5)       | N2          | C6          | C5          | 113.40(14)     |
| C1          | N1          | Mn1         | 123.74(12)     | N2          | C6          | C7          | 126.04(15)     |
| C1          | N1          | C5          | 118.27(15)     | C5          | C6          | C7          | 120.56(14)     |
| C5          | N1          | Mn1         | 117.25(11)     | N4          | C8          | N3          | 114.04(15)     |
| N3          | N2          | Mn1         | 114.76(10)     | N5          | C8          | N3          | 118.23(15)     |
| C6          | N2          | Mn1         | 122.92(11)     | N5          | C8          | N4          | 127.73(16)     |
| C6          | N2          | N3          | 122.24(14)     |             |             |             |                |

## 5.2 Crystal Structures details of Complex C2

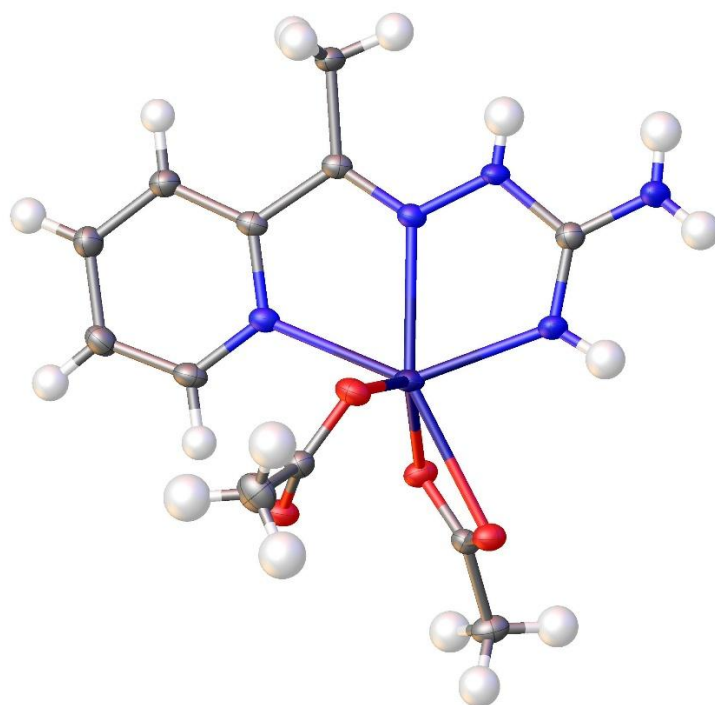

Figure S5: Molecular structure of complex 2 with displacement ellipsoids drawn at 50 % probability level. (C in grey, H in white, N in blue, Mn in dark blue, Cl in green). All hydrogen atoms attached to the nitrogen atoms were found in the Difference Fourier Map and refined freely.

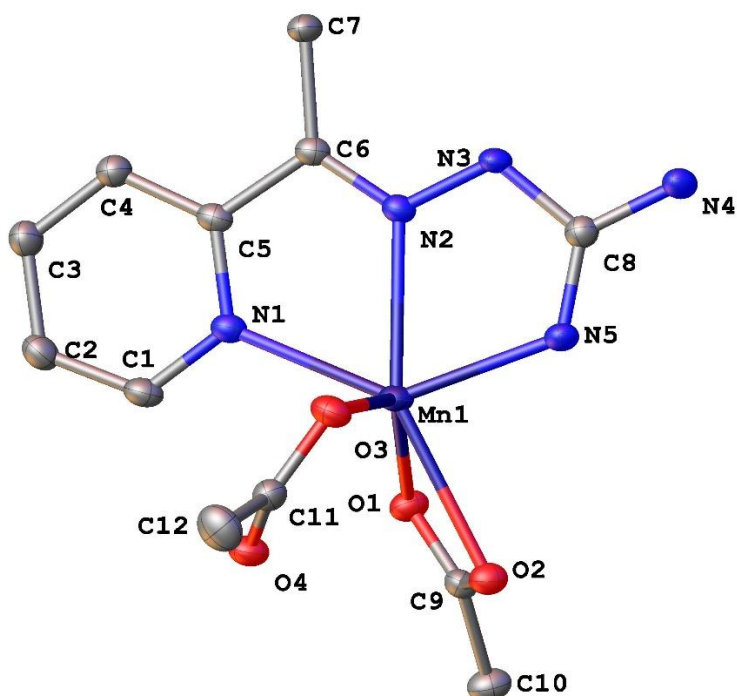

Figure S6: Molecular structure of complex 2 with displacement ellipsoids drawn at 50 % probability level. H atoms are omitted for clarity (C in grey, N in blue, Mn in dark blue, Cl in green).

**Table 5.** Crystal data and structure refinement for **C2** (CCDC 2348644).

|                                                              |                                                                              |
|--------------------------------------------------------------|------------------------------------------------------------------------------|
| Identification code                                          | aa310_auto                                                                   |
| Empirical formula                                            | C <sub>12</sub> H <sub>17</sub> MnN <sub>5</sub> O <sub>4</sub>              |
| Formula weight                                               | 350.24                                                                       |
| Temperature/K                                                | 100.00(10)                                                                   |
| Crystal system                                               | triclinic                                                                    |
| Space group                                                  | <i>P</i> -1                                                                  |
| <i>a</i> /Å                                                  | 8.3343(3)                                                                    |
| <i>b</i> /Å                                                  | 8.4136(3)                                                                    |
| <i>c</i> /Å                                                  | 12.5945(4)                                                                   |
| $\alpha$ /°                                                  | 73.241(3)                                                                    |
| $\beta$ /°                                                   | 83.832(3)                                                                    |
| $\gamma$ /°                                                  | 60.862(3)                                                                    |
| Volume/Å <sup>3</sup>                                        | 738.05(5)                                                                    |
| <i>Z</i>                                                     | 2                                                                            |
| $\rho_{\text{calc}}/\text{cm}^3$                             | 1.576                                                                        |
| $\mu/\text{mm}^{-1}$                                         | 7.526                                                                        |
| <i>F</i> (000)                                               | 362.0                                                                        |
| Crystal size/mm <sup>3</sup>                                 | 0.16 × 0.12 × 0.08                                                           |
| Radiation                                                    | Cu K $\alpha$ ( $\lambda$ = 1.54184)                                         |
| 2 $\Theta$ range for data collection/°                       | 7.336 to 160.038                                                             |
| Index ranges                                                 | -10 ≤ <i>h</i> ≤ 8, -10 ≤ <i>k</i> ≤ 10, -16 ≤ <i>l</i> ≤ 16                 |
| Reflections collected                                        | 21434                                                                        |
| Independent reflections                                      | 3124 [ <i>R</i> <sub>int</sub> = 0.0406, <i>R</i> <sub>sigma</sub> = 0.0244] |
| Data/restraints/parameters                                   | 3124/0/218                                                                   |
| Goodness-of-fit on <i>F</i> <sup>2</sup>                     | 1.126                                                                        |
| Final <i>R</i> indexes [ <i>I</i> ≥ 2 $\sigma$ ( <i>I</i> )] | <i>R</i> <sub>1</sub> = 0.0284, <i>wR</i> <sub>2</sub> = 0.0797              |
| Final <i>R</i> indexes [all data]                            | <i>R</i> <sub>1</sub> = 0.0299, <i>wR</i> <sub>2</sub> = 0.0805              |
| Largest diff. peak/hole / e Å <sup>-3</sup>                  | 0.36/-0.44                                                                   |

**Table 6.** Fractional Atomic Coordinates ( $\times 10^4$ ) and Equivalent Isotropic Displacement Parameters ( $\text{\AA}^2 \times 10^3$ ) for aa310\_auto.  $U_{\text{eq}}$  is defined as 1/3 of the trace of the orthogonalised  $U_{\text{ij}}$  tensor.

| Atom | <i>x</i>    | <i>y</i>   | <i>z</i>   | $U(\text{eq})$ |
|------|-------------|------------|------------|----------------|
| Mn1  | 6881.0(3)   | 3712.5(4)  | 7688.4(2)  | 17.44(10)      |
| O1   | 6725.0(17)  | 6492.1(17) | 7081.7(10) | 21.0(3)        |
| O2   | 7643.3(17)  | 5183.6(17) | 8847.3(10) | 20.6(2)        |
| O3   | 8936.2(17)  | 926.4(17)  | 8425.1(11) | 22.9(3)        |
| O4   | 10625.4(17) | 2313.2(18) | 7706.7(10) | 22.8(3)        |
| N1   | 7569.7(19)  | 3257.7(19) | 5906.8(12) | 18.1(3)        |
| N2   | 4818.2(19)  | 3105.7(19) | 7007.4(11) | 16.9(3)        |
| N3   | 3461(2)     | 3093(2)    | 7700.3(12) | 18.5(3)        |
| N4   | 1838(2)     | 3984(2)    | 9201.9(13) | 23.5(3)        |
| N5   | 4598(2)     | 4136(2)    | 8782.6(12) | 20.7(3)        |
| C1   | 8970(2)     | 3399(2)    | 5344.0(15) | 21.1(3)        |
| C2   | 9514(2)     | 2952(3)    | 4342.3(15) | 23.3(4)        |
| C3   | 8542(2)     | 2321(3)    | 3900.4(15) | 22.7(4)        |
| C4   | 7071(2)     | 2187(2)    | 4464.8(14) | 20.5(3)        |
| C5   | 6615(2)     | 2661(2)    | 5467.3(13) | 17.0(3)        |
| C6   | 5063(2)     | 2561(2)    | 6120.8(13) | 16.8(3)        |
| C7   | 3989(2)     | 1792(3)    | 5759.8(14) | 20.7(3)        |
| C8   | 3324(2)     | 3766(2)    | 8601.0(14) | 18.1(3)        |
| C9   | 7262(2)     | 6526(2)    | 7977.9(14) | 17.9(3)        |
| C10  | 7444(3)     | 8217(2)    | 7995.9(15) | 24.1(4)        |
| C11  | 10472(2)    | 894(2)     | 8279.4(14) | 20.3(3)        |
| C12  | 12169(3)    | -909(3)    | 8811.0(18) | 31.6(4)        |

**Table 7.** Bond Lengths for aa310\_auto.

| <b>Atom</b> | <b>Atom</b> | <b>Length/Å</b> | <b>Atom</b> | <b>Atom</b> | <b>Length/Å</b> |
|-------------|-------------|-----------------|-------------|-------------|-----------------|
| Mn1         | O1          | 2.1828(12)      | N2          | C6          | 1.286(2)        |
| Mn1         | O2          | 2.4642(12)      | N3          | C8          | 1.378(2)        |
| Mn1         | O3          | 2.1135(13)      | N4          | C8          | 1.341(2)        |
| Mn1         | N1          | 2.3485(14)      | N5          | C8          | 1.301(2)        |
| Mn1         | N2          | 2.3187(14)      | C1          | C2          | 1.387(3)        |
| Mn1         | N5          | 2.1690(15)      | C2          | C3          | 1.391(3)        |
| O1          | C9          | 1.271(2)        | C3          | C4          | 1.387(3)        |
| O2          | C9          | 1.260(2)        | C4          | C5          | 1.392(2)        |
| O3          | C11         | 1.261(2)        | C5          | C6          | 1.481(2)        |
| O4          | C11         | 1.263(2)        | C6          | C7          | 1.498(2)        |
| N1          | C1          | 1.337(2)        | C9          | C10         | 1.509(2)        |
| N1          | C5          | 1.355(2)        | C11         | C12         | 1.510(2)        |
| N2          | N3          | 1.355(2)        |             |             |                 |

**Table 8** .Bond Angles for aa310\_auto.

| Atom | Atom | Atom | Angle/°    | Atom | Atom | Atom | Angle/°    |
|------|------|------|------------|------|------|------|------------|
| O1   | Mn1  | O2   | 56.35(4)   | C6   | N2   | N3   | 121.33(14) |
| O1   | Mn1  | N1   | 90.24(5)   | N2   | N3   | C8   | 115.10(14) |
| O1   | Mn1  | N2   | 120.30(5)  | C8   | N5   | Mn1  | 120.70(12) |
| O3   | Mn1  | O1   | 136.14(5)  | N1   | C1   | C2   | 123.83(16) |
| O3   | Mn1  | O2   | 95.24(5)   | C1   | C2   | C3   | 117.89(16) |
| O3   | Mn1  | N1   | 91.35(5)   | C4   | C3   | C2   | 119.14(16) |
| O3   | Mn1  | N2   | 100.50(5)  | C3   | C4   | C5   | 119.41(16) |
| O3   | Mn1  | N5   | 104.12(5)  | N1   | C5   | C4   | 121.65(15) |
| N1   | Mn1  | O2   | 136.26(5)  | N1   | C5   | C6   | 115.56(14) |
| N2   | Mn1  | O2   | 151.46(5)  | C4   | C5   | C6   | 122.79(15) |
| N2   | Mn1  | N1   | 67.34(5)   | N2   | C6   | C5   | 113.90(14) |
| N5   | Mn1  | O1   | 104.35(5)  | N2   | C6   | C7   | 125.64(15) |
| N5   | Mn1  | O2   | 83.07(5)   | C5   | C6   | C7   | 120.40(14) |
| N5   | Mn1  | N1   | 136.67(5)  | N4   | C8   | N3   | 114.81(15) |
| N5   | Mn1  | N2   | 70.11(5)   | N5   | C8   | N3   | 118.51(15) |
| C9   | O1   | Mn1  | 97.39(10)  | N5   | C8   | N4   | 126.68(16) |
| C9   | O2   | Mn1  | 84.77(9)   | O1   | C9   | C10  | 118.99(15) |
| C11  | O3   | Mn1  | 107.74(11) | O2   | C9   | O1   | 121.47(15) |
| C1   | N1   | Mn1  | 122.93(11) | O2   | C9   | C10  | 119.54(15) |
| C1   | N1   | C5   | 118.08(14) | O3   | C11  | O4   | 122.13(16) |
| C5   | N1   | Mn1  | 118.72(11) | O3   | C11  | C12  | 118.32(16) |
| N3   | N2   | Mn1  | 114.62(10) | O4   | C11  | C12  | 119.55(16) |
| C6   | N2   | Mn1  | 123.36(11) |      |      |      |            |

### 5.3 Crystal Structures details of Complex C3

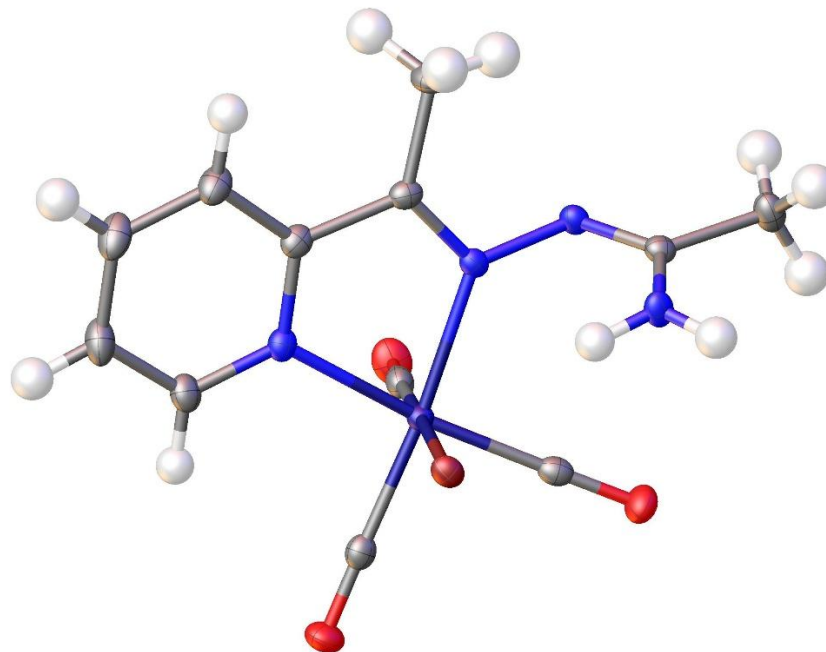

Figure S7: Molecular structure of complex 3 with displacement ellipsoids drawn at 50 % probability level. (C in grey, H in white, N in blue, Mn in dark blue, Cl in green). All hydrogen atoms attached to the nitrogen atoms were found in the Difference Fourier Map and refined freely.

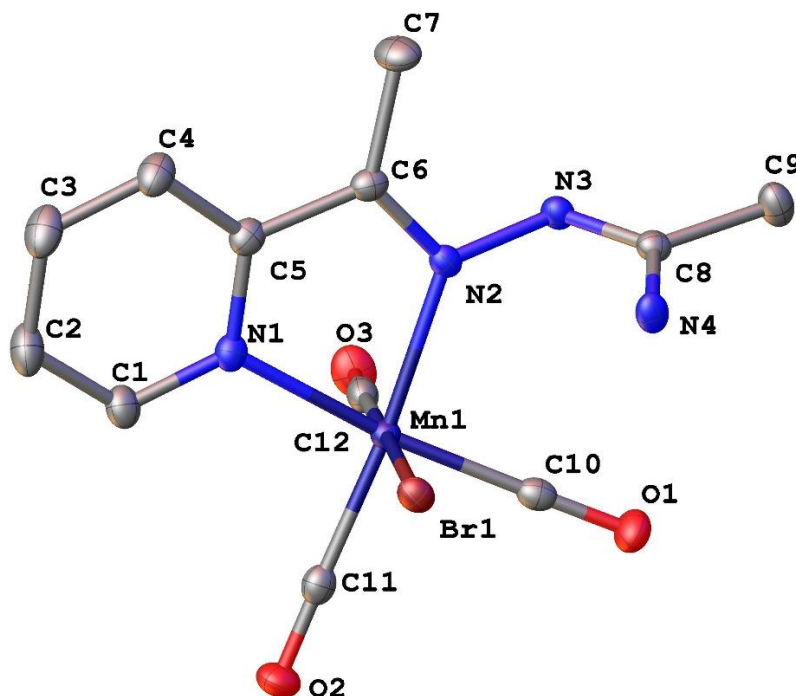

Figure S8: Molecular structure of complex 3 with displacement ellipsoids drawn at 50 % probability level. H atoms are omitted for clarity (C in grey, N in blue, Mn in dark blue, Cl in green).

**Table 9.** Crystal data and structure refinement for **C3** (CCDC 2348861).

|                                             |                                                                   |
|---------------------------------------------|-------------------------------------------------------------------|
| Identification code                         | AA2-130_auto                                                      |
| Empirical formula                           | C <sub>12</sub> H <sub>12</sub> BrMnN <sub>4</sub> O <sub>3</sub> |
| Formula weight                              | 395.11                                                            |
| Temperature/K                               | 99.99(10)                                                         |
| Crystal system                              | monoclinic                                                        |
| Space group                                 | P2 <sub>1</sub> /n                                                |
| a/Å                                         | 10.51700(10)                                                      |
| b/Å                                         | 9.98160(10)                                                       |
| c/Å                                         | 14.63770(10)                                                      |
| α/°                                         | 90                                                                |
| β/°                                         | 90.8590(10)                                                       |
| γ/°                                         | 90                                                                |
| Volume/Å <sup>3</sup>                       | 1536.44(2)                                                        |
| Z                                           | 4                                                                 |
| ρ <sub>calc</sub> /cm <sup>3</sup>          | 1.708                                                             |
| μ/mm <sup>-1</sup>                          | 10.177                                                            |
| F(000)                                      | 784.0                                                             |
| Crystal size/mm <sup>3</sup>                | 0.18 × 0.12 × 0.09                                                |
| Radiation                                   | Cu Kα (λ = 1.54184)                                               |
| 2θ range for data collection/°              | 10.284 to 160.232                                                 |
| Index ranges                                | -12 ≤ h ≤ 13, -12 ≤ k ≤ 12, -18 ≤ l ≤ 17                          |
| Reflections collected                       | 16918                                                             |
| Independent reflections                     | 3368 [R <sub>int</sub> = 0.0322, R <sub>sigma</sub> = 0.0251]     |
| Data/restraints/parameters                  | 3368/0/200                                                        |
| Goodness-of-fit on F <sup>2</sup>           | 1.082                                                             |
| Final R indexes [I ≥ 2σ (I)]                | R <sub>1</sub> = 0.0230, wR <sub>2</sub> = 0.0595                 |
| Final R indexes [all data]                  | R <sub>1</sub> = 0.0237, wR <sub>2</sub> = 0.0598                 |
| Largest diff. peak/hole / e Å <sup>-3</sup> | 0.39/-0.52                                                        |

**Table 10.** Bond Lengths for AA2-130\_auto.

| Atom | Atom | Length/Å   | Atom | Atom | Length/Å |
|------|------|------------|------|------|----------|
| Br1  | Mn1  | 2.5354(3)  | N2   | N3   | 1.413(2) |
| Mn1  | N1   | 2.0458(15) | N2   | C6   | 1.291(2) |
| Mn1  | N2   | 2.0411(14) | N3   | C8   | 1.301(2) |
| Mn1  | C10  | 1.8167(19) | N4   | C8   | 1.337(2) |
| Mn1  | C11  | 1.8201(18) | C1   | C2   | 1.390(3) |
| Mn1  | C12  | 1.806(2)   | C2   | C3   | 1.386(3) |
| O1   | C10  | 1.146(2)   | C3   | C4   | 1.388(3) |
| O2   | C11  | 1.146(2)   | C4   | C5   | 1.385(3) |
| O3   | C12  | 1.142(2)   | C5   | C6   | 1.473(2) |
| N1   | C1   | 1.337(2)   | C6   | C7   | 1.498(2) |
| N1   | C5   | 1.358(2)   | C8   | C9   | 1.498(3) |

**Table 11.** Bond Angles for AA2-130\_auto.

| Atom | Atom | Atom | Angle/°    | Atom | Atom | Atom | Angle/°    |
|------|------|------|------------|------|------|------|------------|
| N1   | Mn1  | Br1  | 82.95(4)   | C6   | N2   | Mn1  | 118.16(12) |
| N2   | Mn1  | Br1  | 90.67(4)   | C6   | N2   | N3   | 117.08(14) |
| N2   | Mn1  | N1   | 77.81(6)   | C8   | N3   | N2   | 114.91(14) |
| C10  | Mn1  | Br1  | 89.95(6)   | N1   | C1   | C2   | 122.70(18) |
| C10  | Mn1  | N1   | 169.71(7)  | C3   | C2   | C1   | 118.99(18) |
| C10  | Mn1  | N2   | 94.91(7)   | C2   | C3   | C4   | 118.74(18) |
| C10  | Mn1  | C11  | 90.34(8)   | C5   | C4   | C3   | 119.20(18) |
| C11  | Mn1  | Br1  | 88.44(6)   | N1   | C5   | C4   | 122.13(17) |
| C11  | Mn1  | N1   | 96.87(7)   | N1   | C5   | C6   | 114.40(15) |
| C11  | Mn1  | N2   | 174.67(7)  | C4   | C5   | C6   | 123.46(16) |
| C12  | Mn1  | Br1  | 178.69(6)  | N2   | C6   | C5   | 114.18(15) |
| C12  | Mn1  | N1   | 97.15(7)   | N2   | C6   | C7   | 124.59(17) |
| C12  | Mn1  | N2   | 90.63(7)   | C5   | C6   | C7   | 121.23(16) |
| C12  | Mn1  | C10  | 90.12(8)   | N3   | C8   | N4   | 125.27(17) |
| C12  | Mn1  | C11  | 90.25(8)   | N3   | C8   | C9   | 117.23(16) |
| C1   | N1   | Mn1  | 126.24(13) | N4   | C8   | C9   | 117.49(16) |
| C1   | N1   | C5   | 118.23(16) | O1   | C10  | Mn1  | 179.49(16) |
| C5   | N1   | Mn1  | 114.96(12) | O2   | C11  | Mn1  | 178.65(17) |
| N3   | N2   | Mn1  | 123.84(11) | O3   | C12  | Mn1  | 176.78(17) |

6.0  $^1\text{H}$  and  $^{13}\text{C}$  NMR spectra of synthesized compounds:

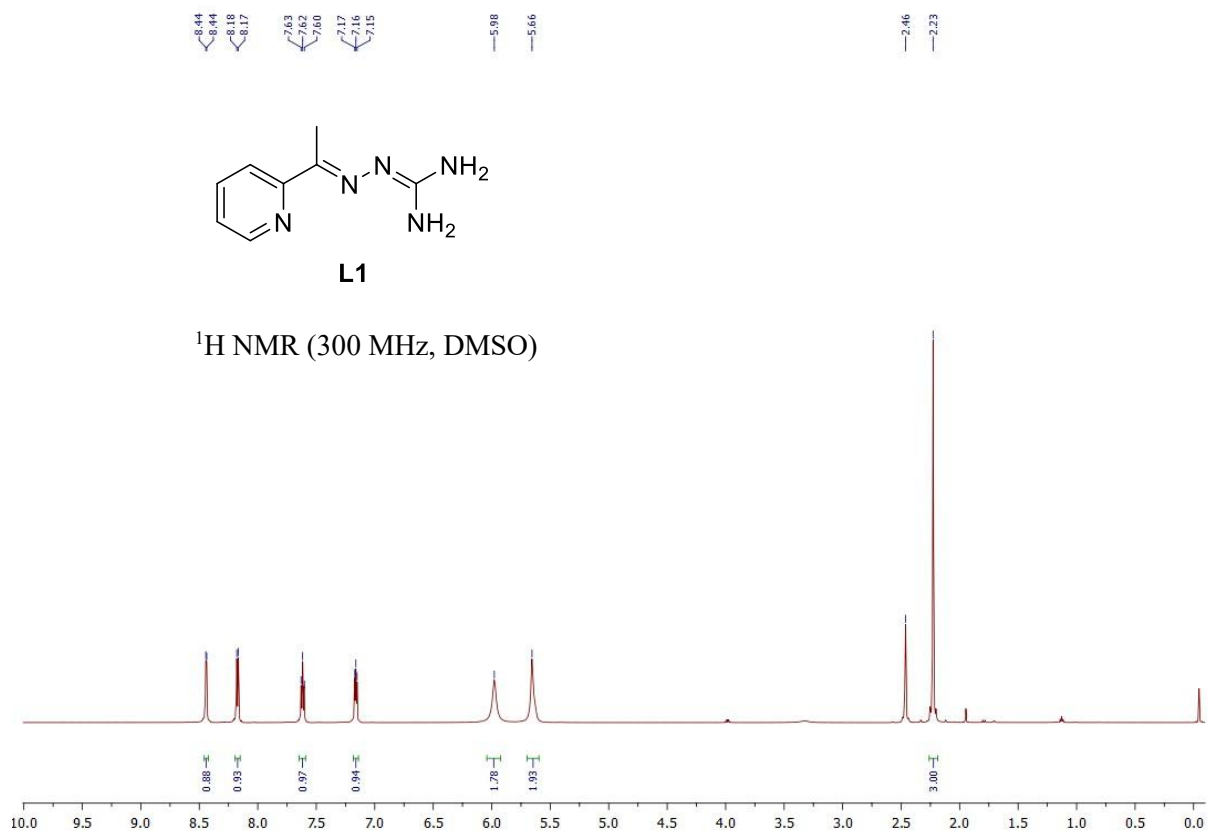

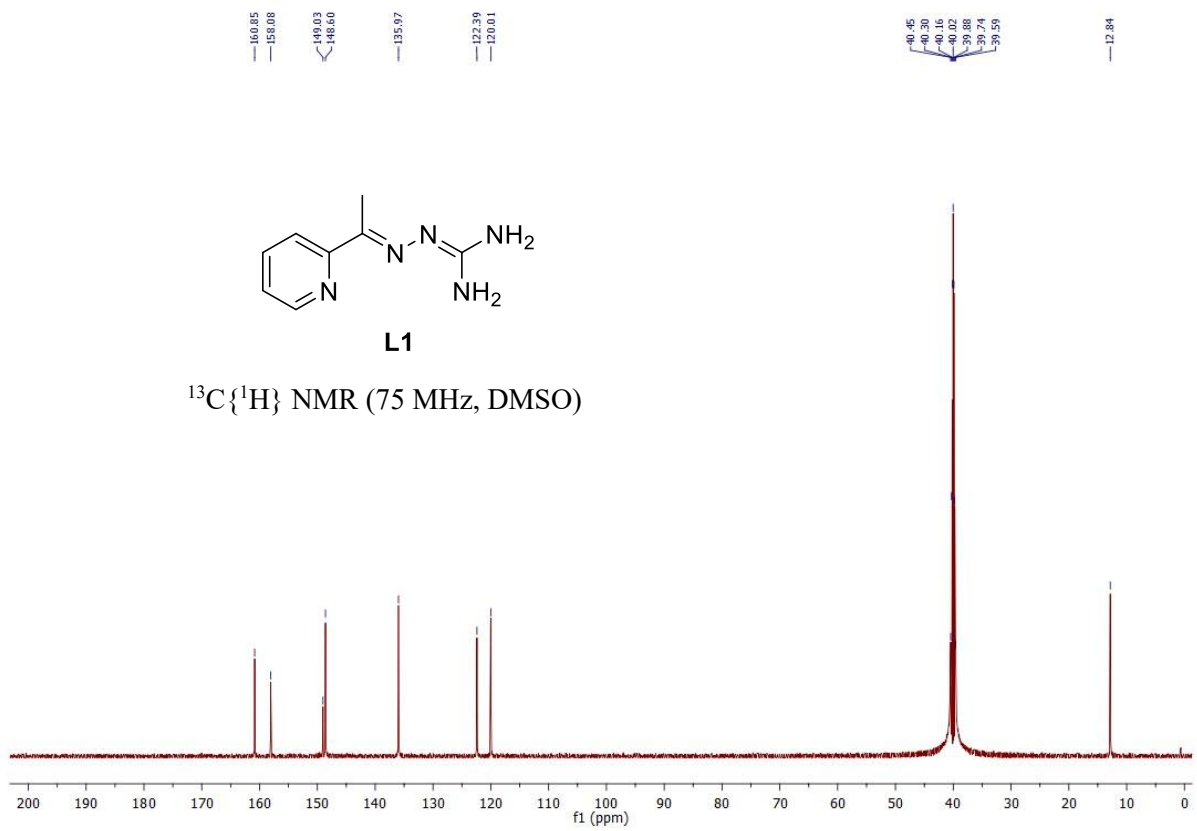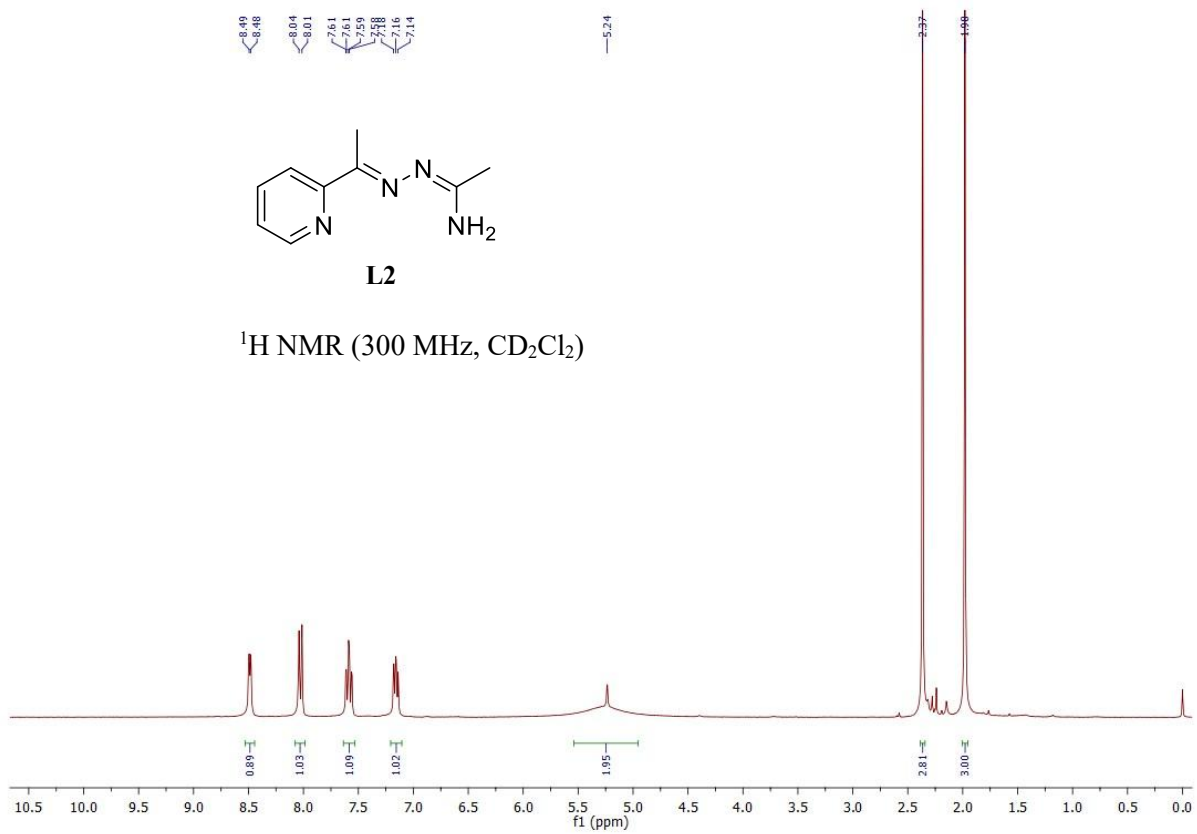

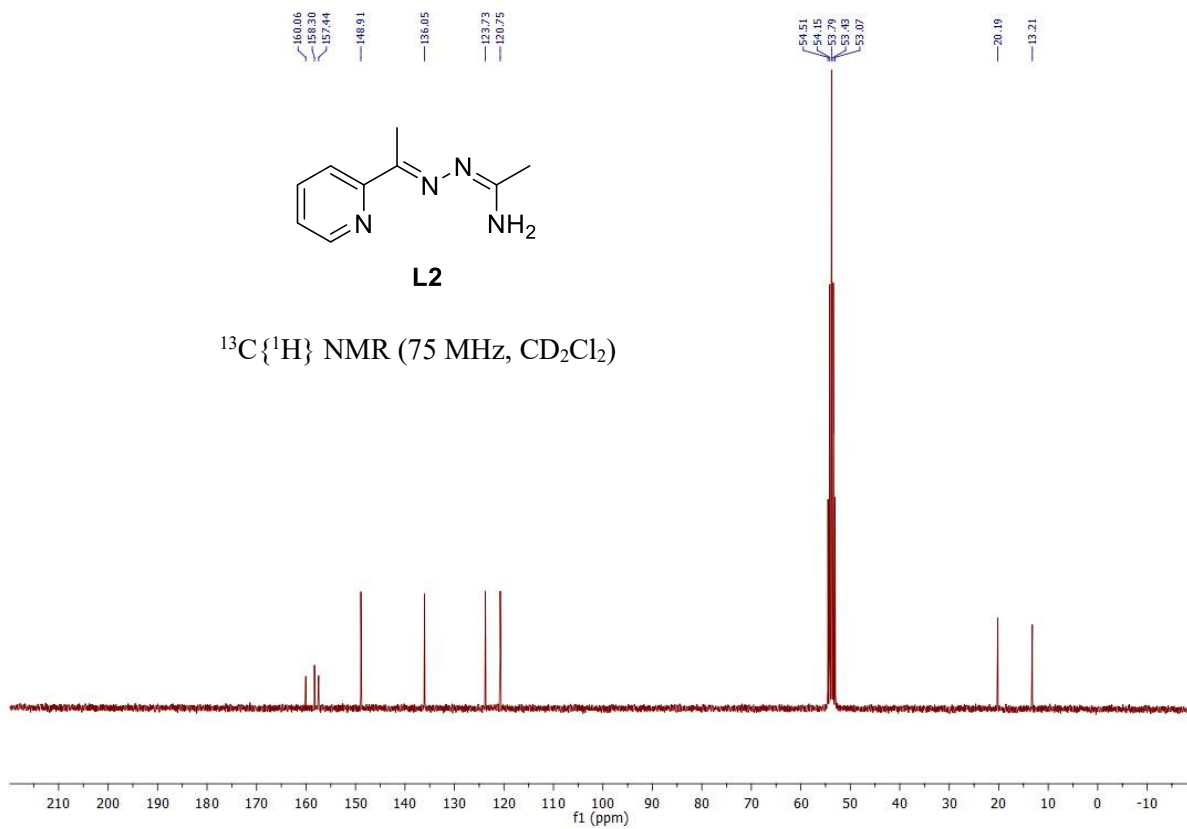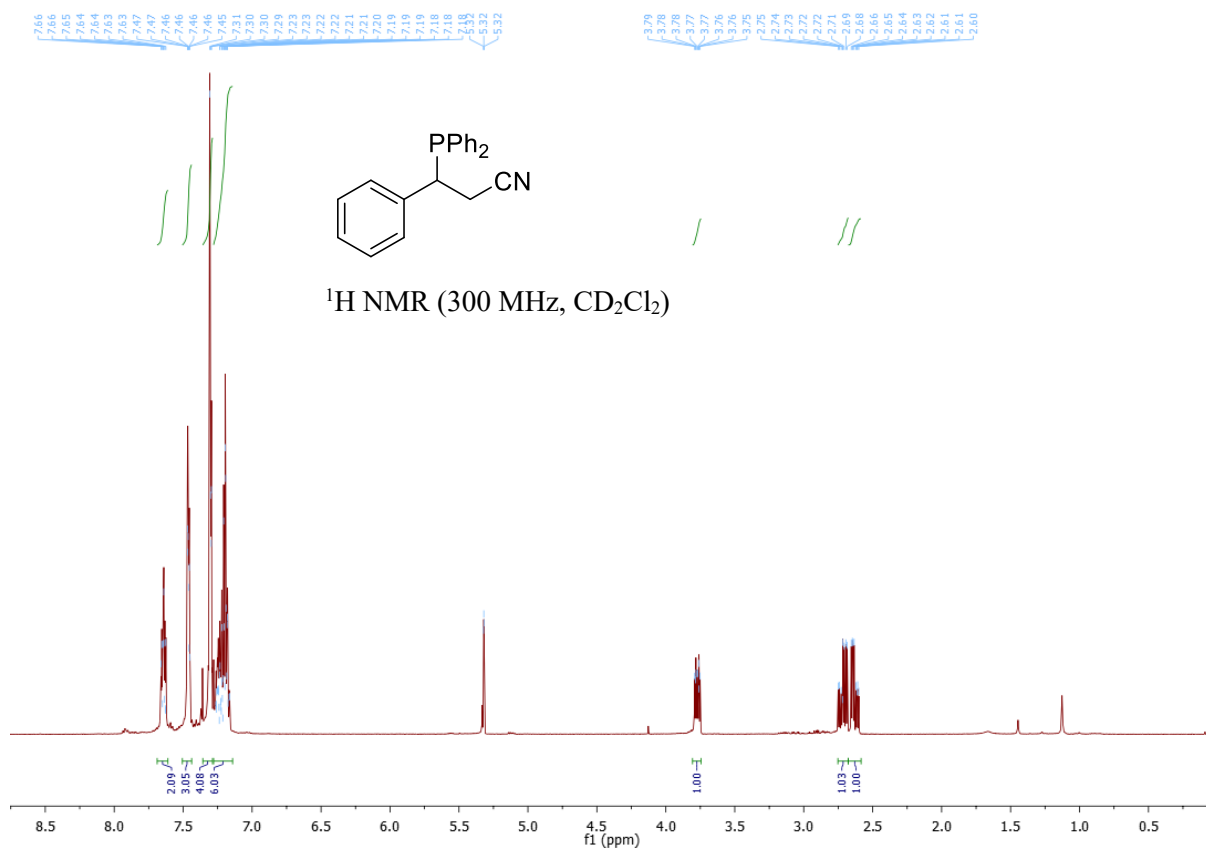

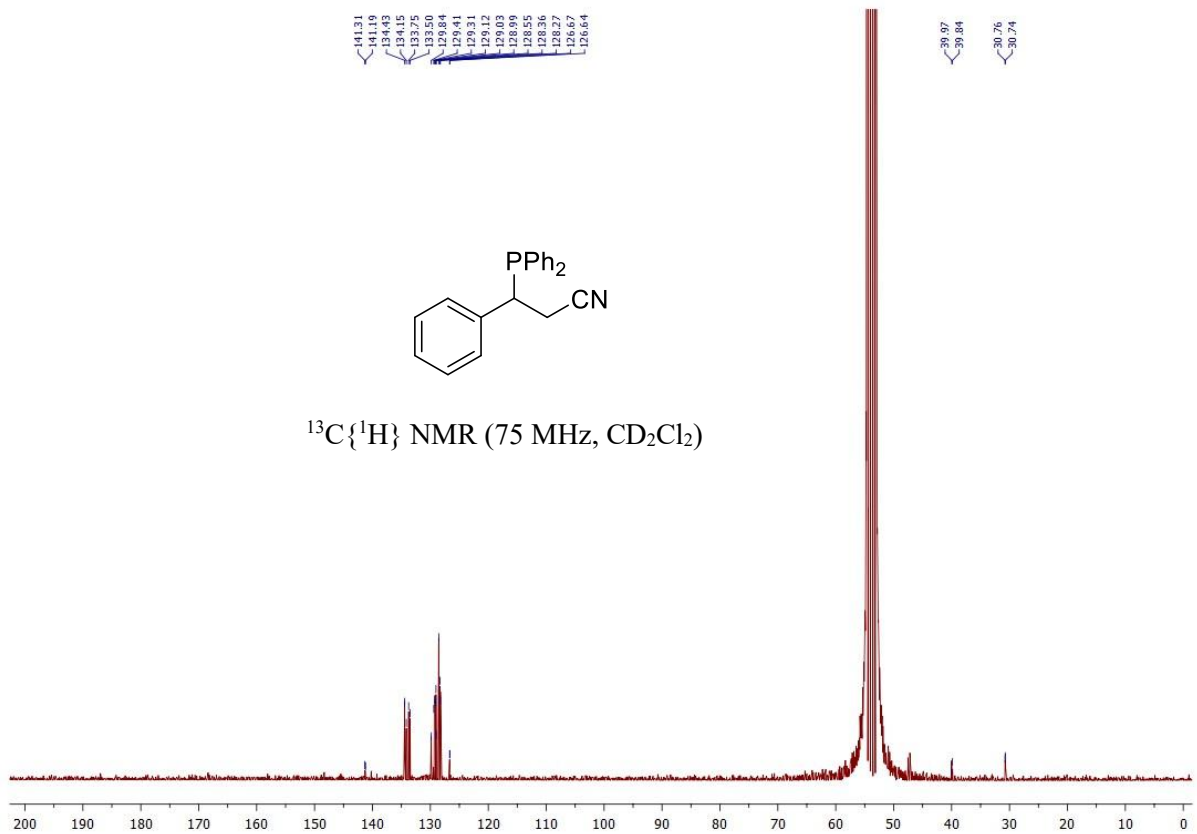

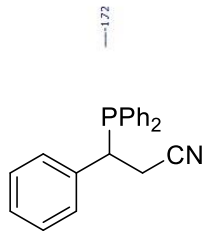

$^{31}\text{P}\{^1\text{H}\}$  NMR (121MHz,  $\text{CD}_2\text{Cl}_2$ )

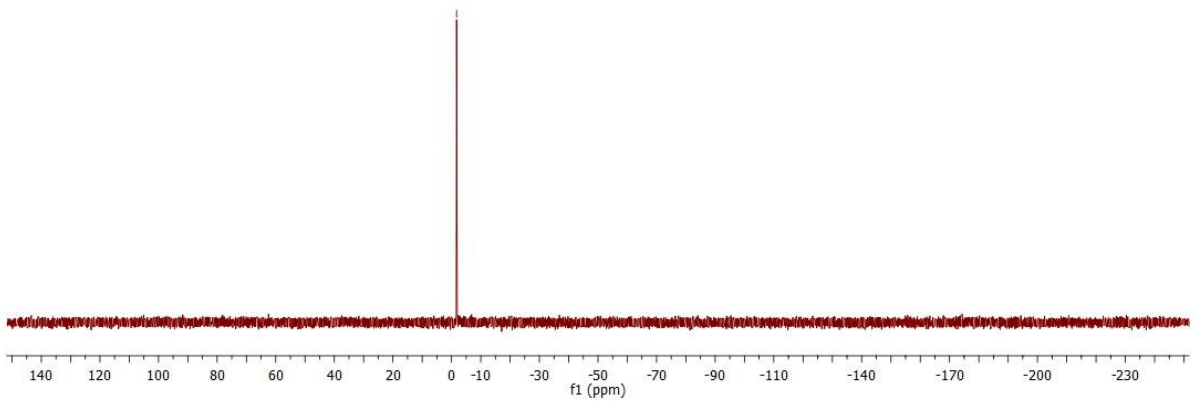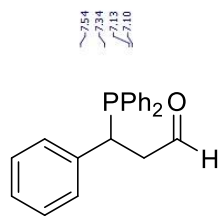

$^1\text{H}$  NMR (300 MHz,  $\text{CD}_2\text{Cl}_2$ )

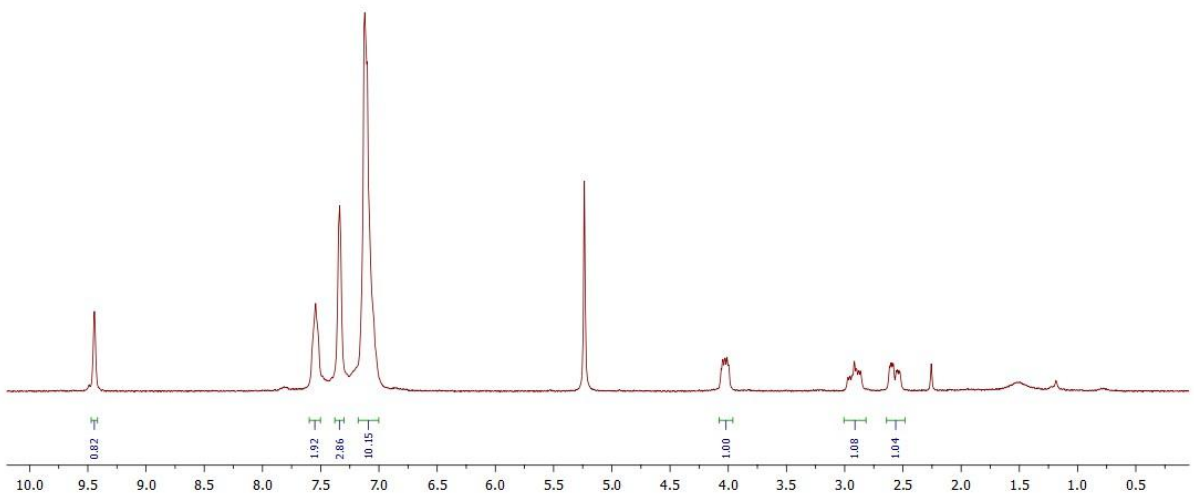

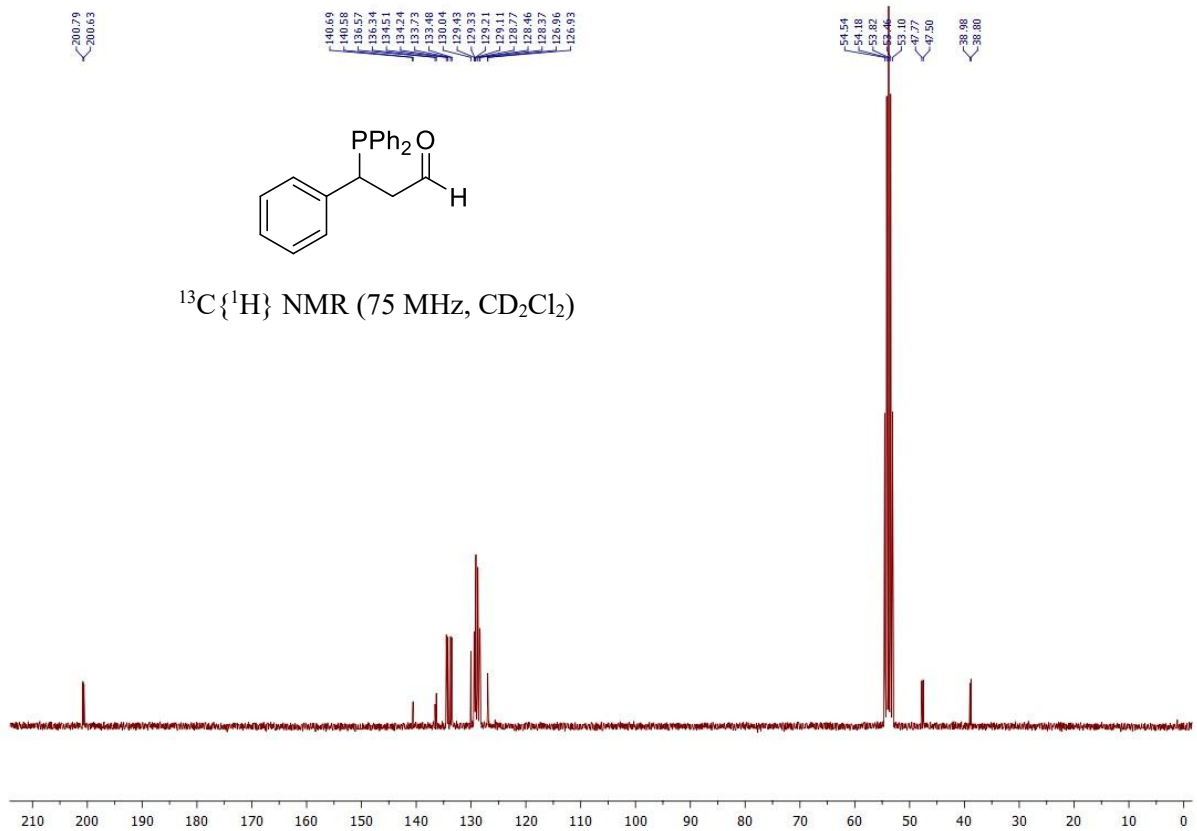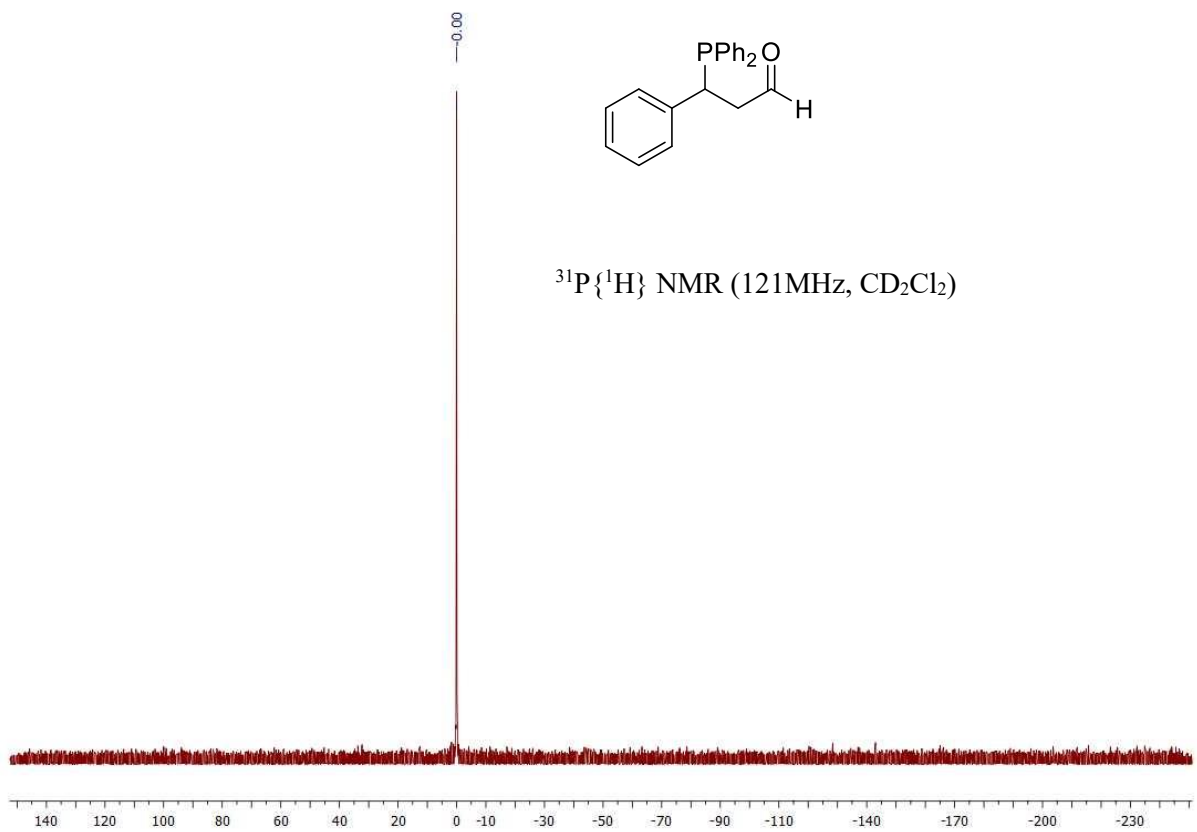

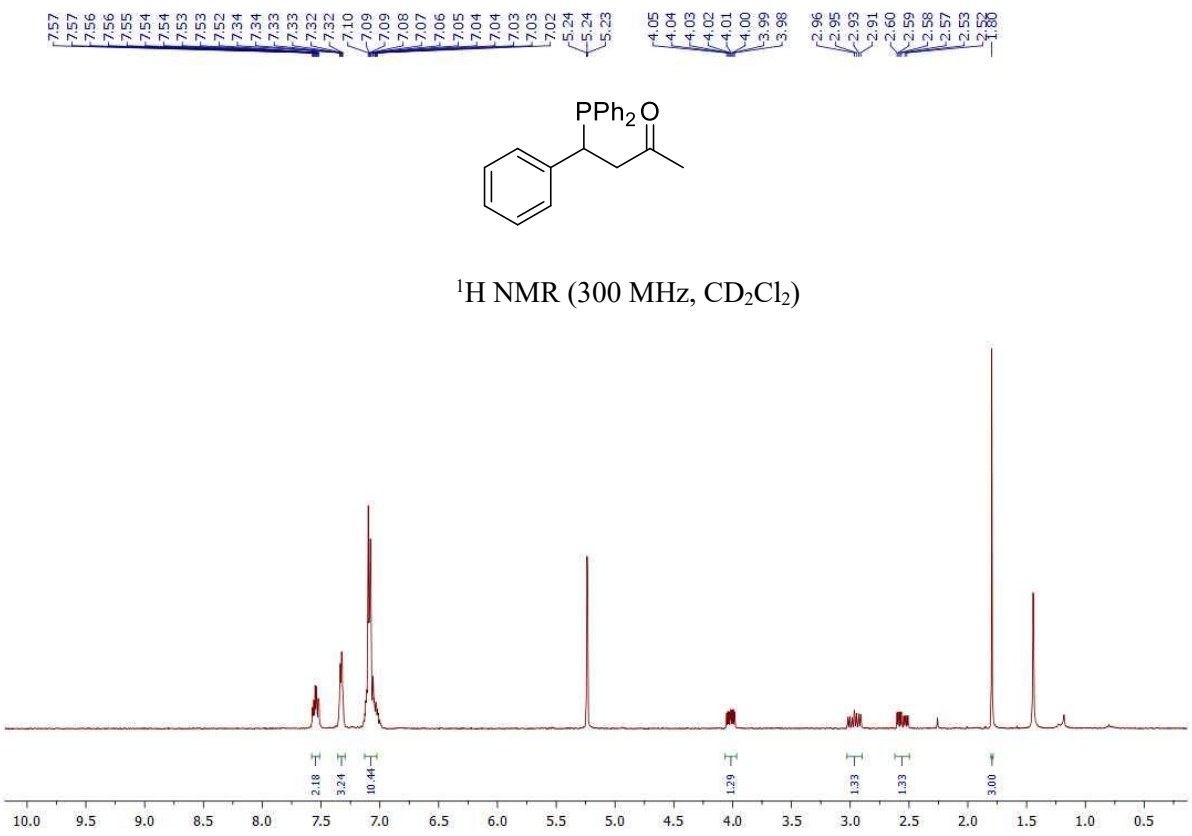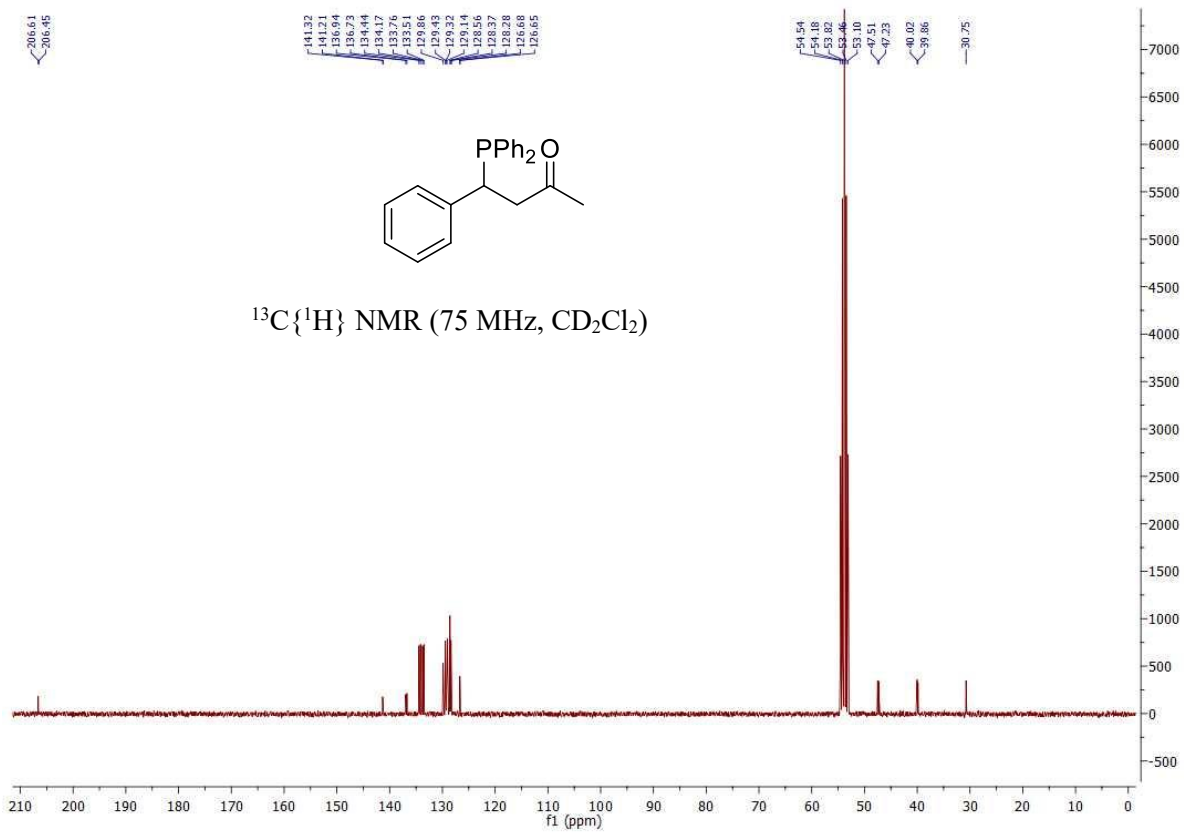

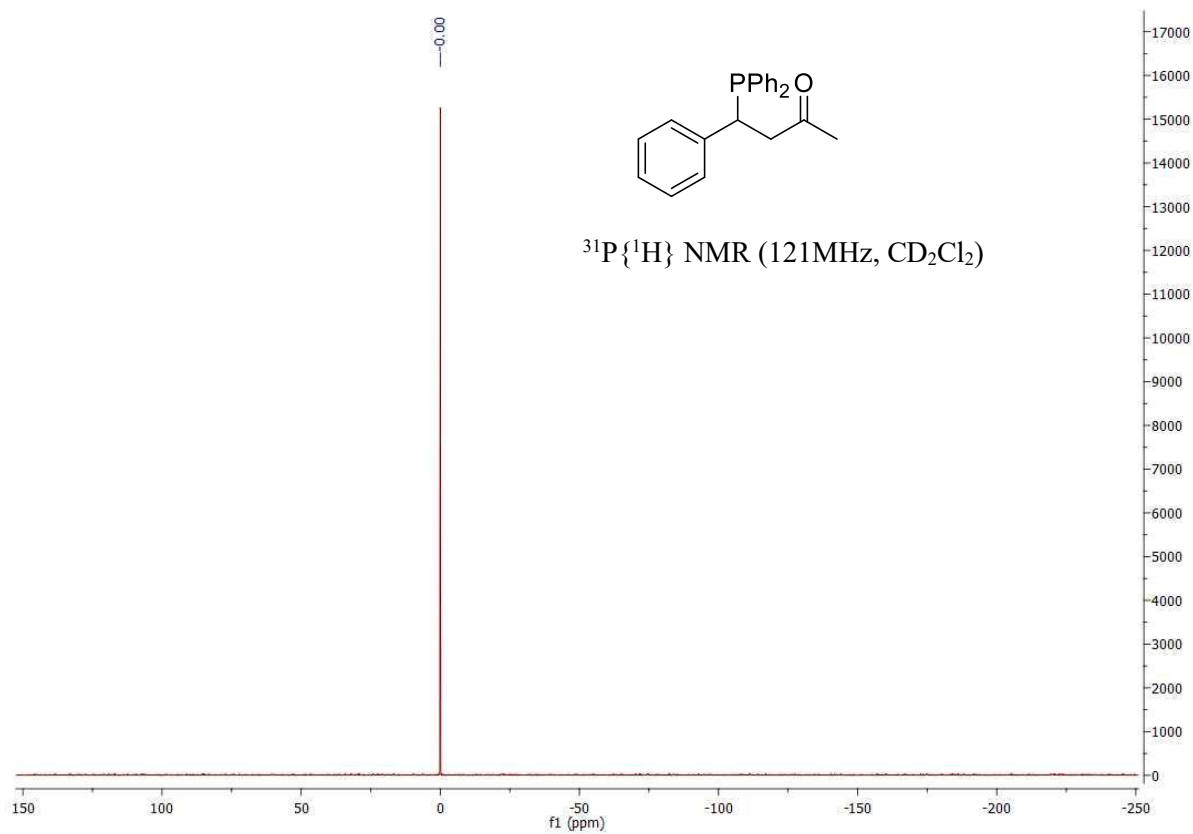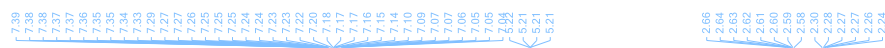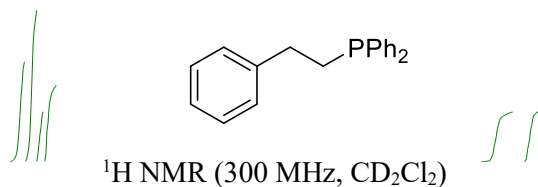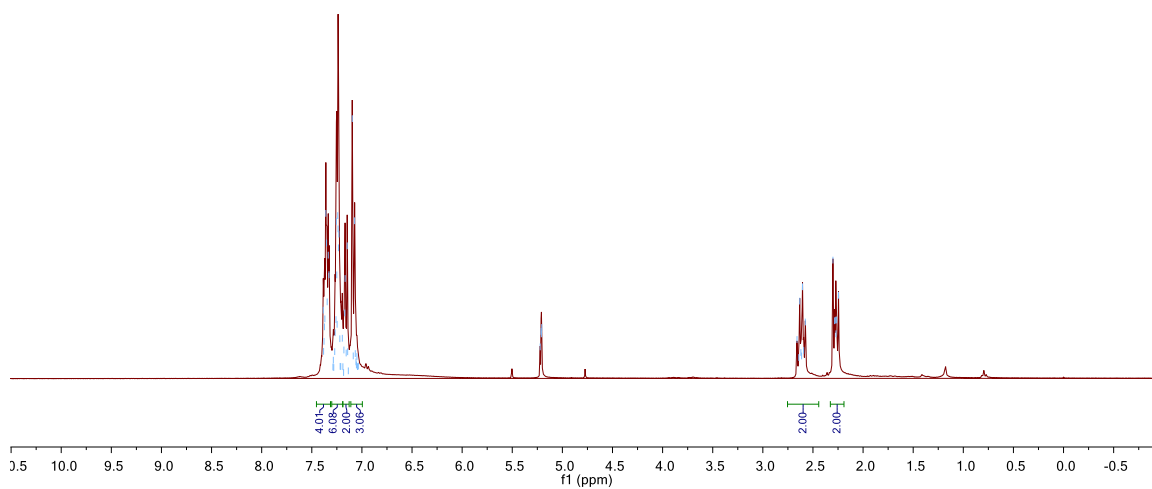

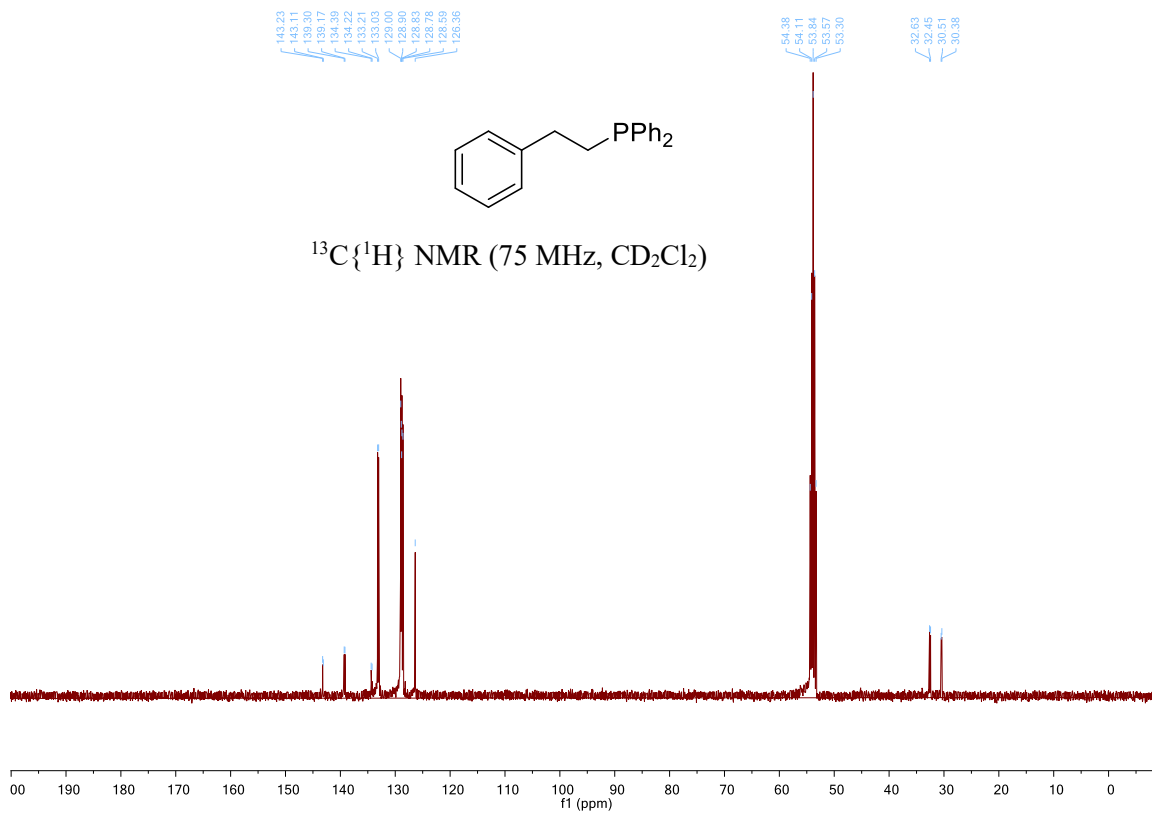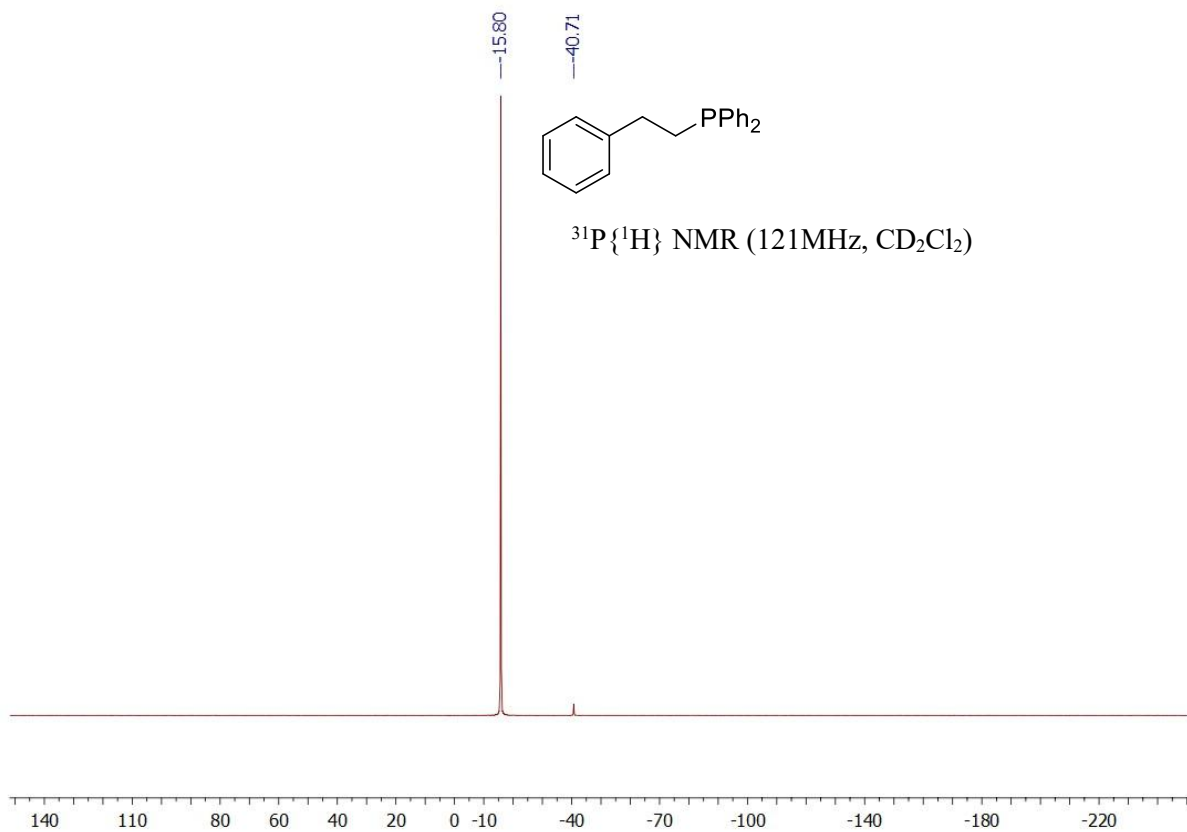

8.41, 8.39, 7.51, 7.50, 7.48, 7.48, 7.45, 7.45, 7.40, 7.38, 7.37, 7.37, 7.35, 7.34, 7.26, 7.25, 7.04, 7.03, 7.01, 6.99, -5.23, 2.82, 2.79, 2.76, 2.73, 2.43, 2.41, 2.40, 2.37

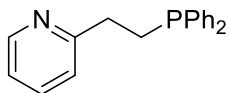

<sup>1</sup>H NMR (300 MHz, CD<sub>2</sub>Cl<sub>2</sub>)

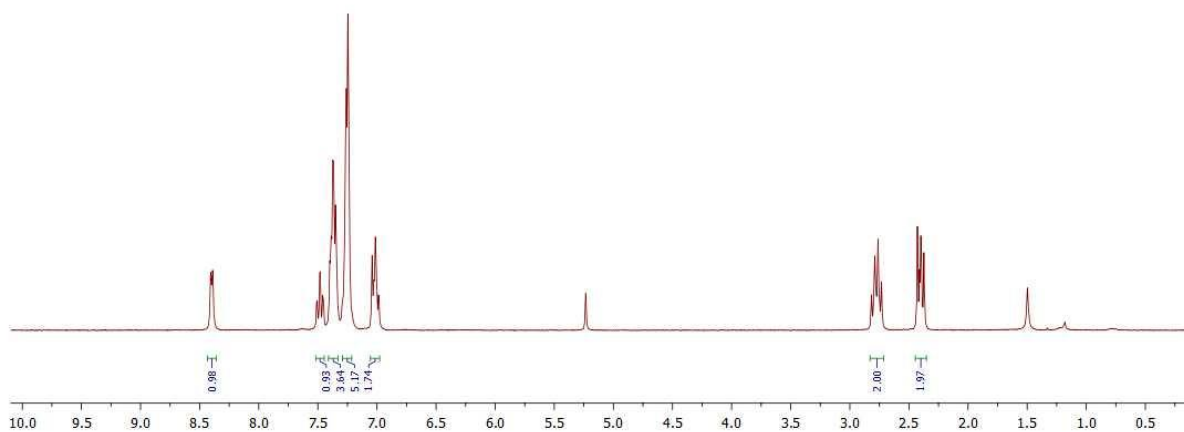

158.52, 158.35, 145.85, 135.46, 135.28, 132.73, 129.43, 129.18, 125.15, 125.06, 124.97, 119.15, 117.70, 50.75, 50.39, 50.03, 49.67, 49.31, 31.16, 30.92, 24.45, 24.29

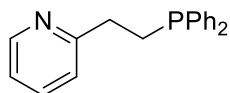

<sup>13</sup>C{<sup>1</sup>H} NMR (75 MHz, CD<sub>2</sub>Cl<sub>2</sub>)

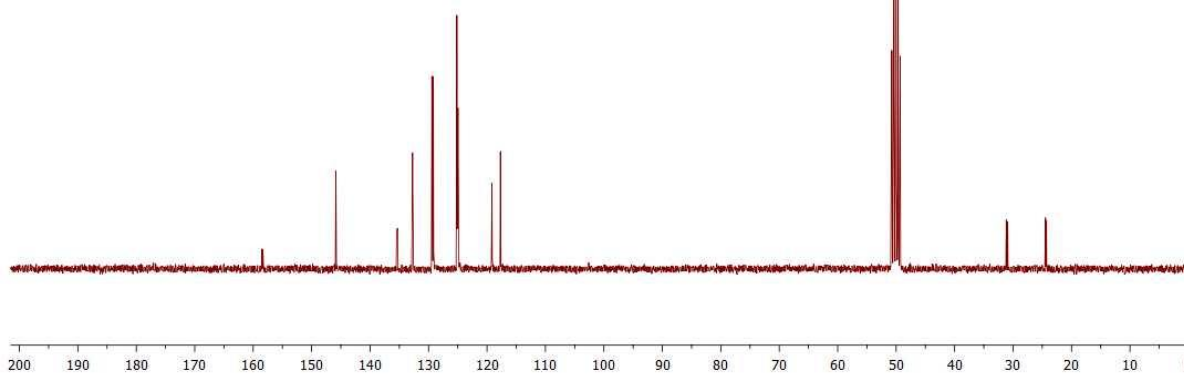

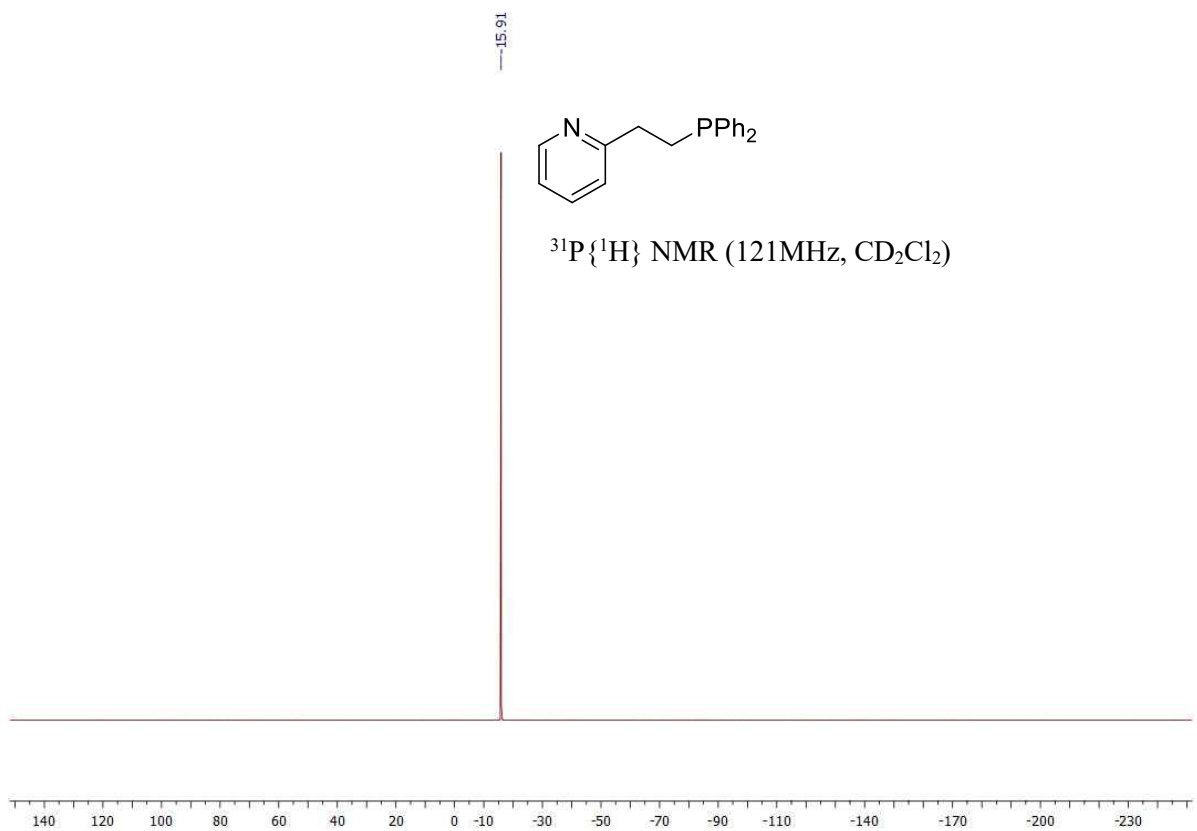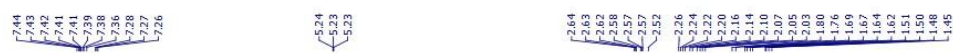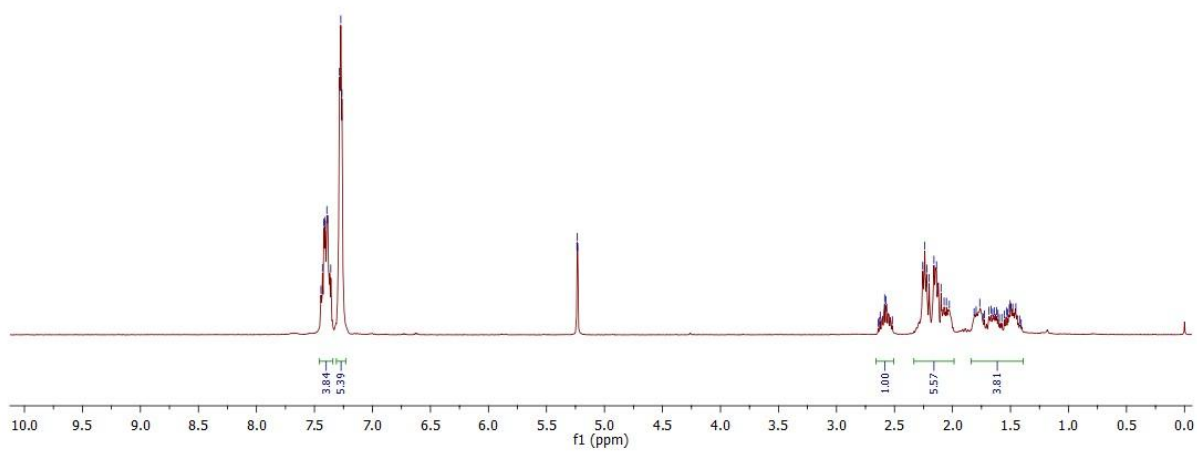

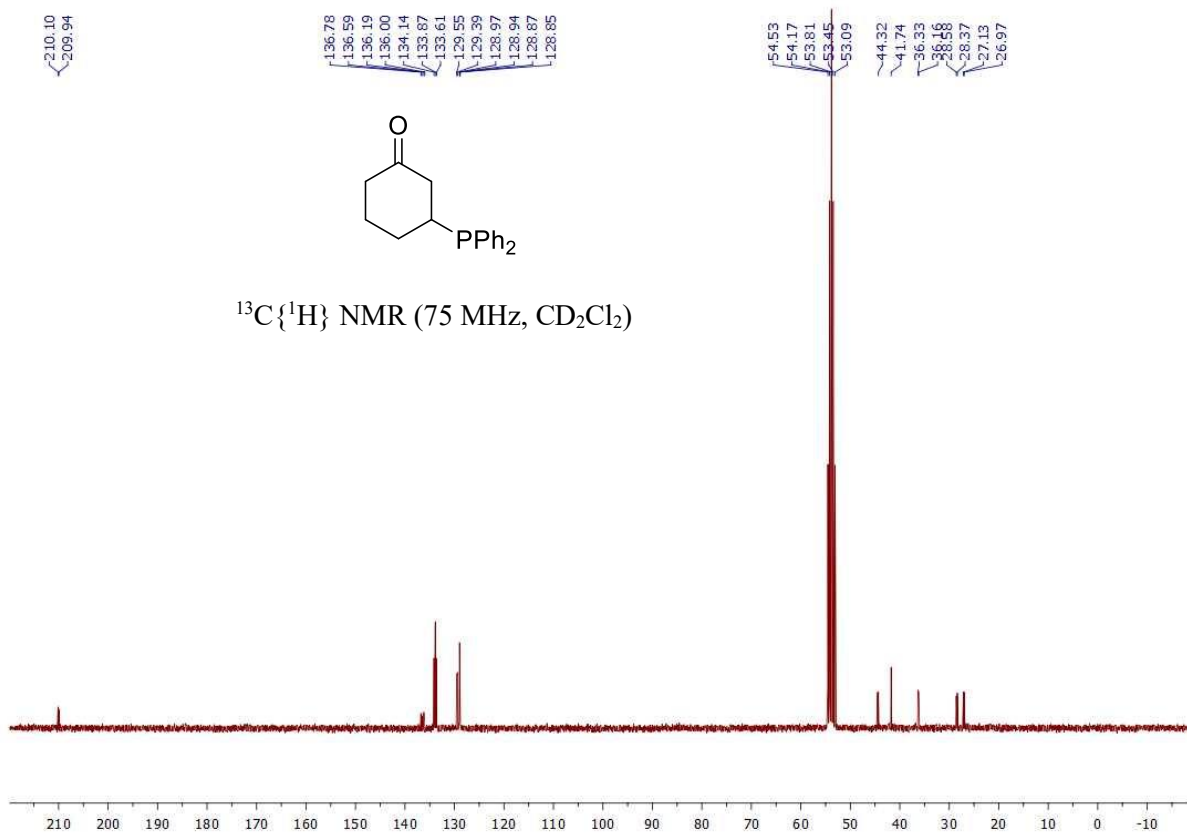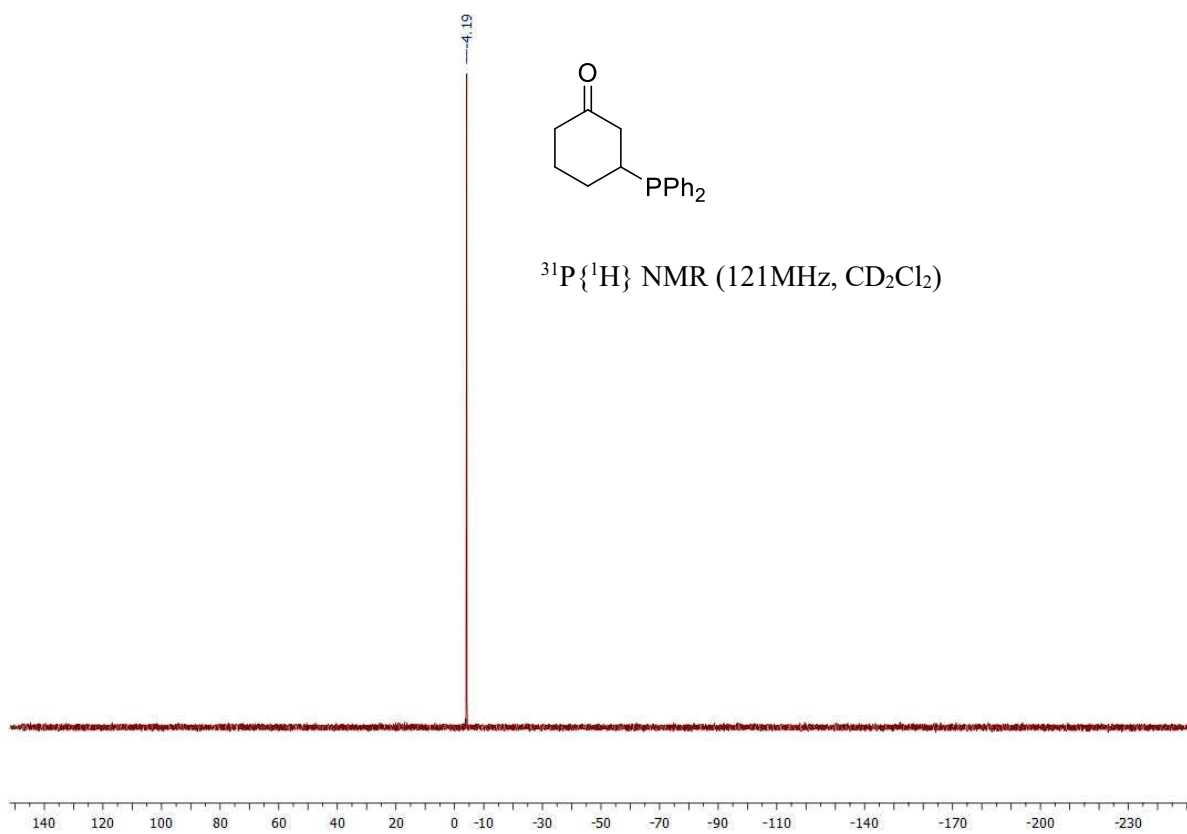



## Mass-spectrum of ligands:

### L1:

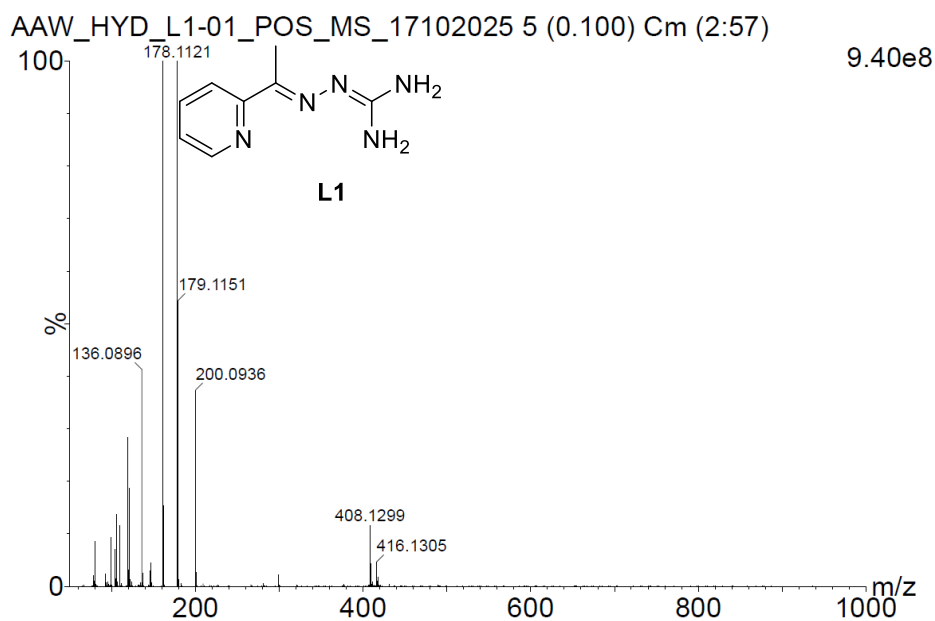

### L2:

BMAX024844 Aabid Wani/Grützmacher - AA357 - MeOH - --

**ETH**  
Eidgenössische Technische Hochschule Zürich  
Swiss Federal Institute of Technology Zurich

#### Acquisition Parameter

|             |                                            |                       |                     |
|-------------|--------------------------------------------|-----------------------|---------------------|
| Method:     | ETH_HyStar_HPLC_QTOF_POS_LowMass_Loop-AS.m | Acquisition Date:     | 18.08.2023 09:26:26 |
| File Name:  | D:\Data\bmax0248xx\BMAX024844.d            | Operator:             | Michael Meier       |
| Source Type | ESI                                        | Ion Polarity          | Positive            |
| Focus       | Active                                     | Set Capillary         | 4500 V              |
| Scan Begin  | 50 m/z                                     | Set End Plate Offset  | -500 V              |
| Scan End    | 1300 m/z                                   | Set Collision Cell RF | 200.0 Vpp           |
|             |                                            | Set Nebulizer         | 1.6 Bar             |
|             |                                            | Set Dry Heater        | 230 °C              |
|             |                                            | Set Dry Gas           | 10.0 l/min          |
|             |                                            | Set Divert Valve      | Source              |

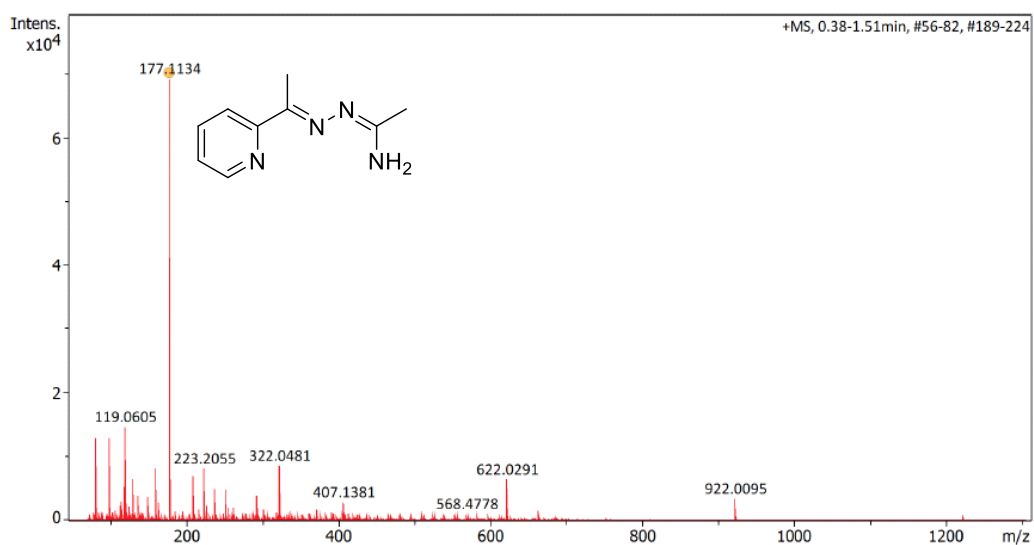

## 7.0 The 3D structures and coordinates of the optimized reactant, intermediates, and products

**St-1**

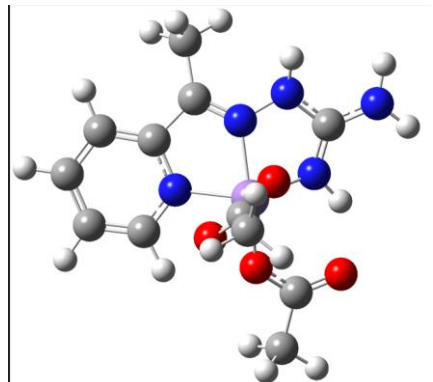

**Energy= -1144.962547 Hartree**

| 1 1 |             |             |             |
|-----|-------------|-------------|-------------|
| C   | -3.83996500 | -1.81335200 | -0.63190200 |
| C   | -2.74443000 | -2.65874900 | -0.61028700 |
| C   | -1.47886500 | -2.12067000 | -0.44742300 |
| C   | -2.34803400 | 0.02463900  | -0.36776400 |
| C   | -3.64083100 | -0.44756900 | -0.50951900 |
| H   | -4.84166000 | -2.21108700 | -0.74208100 |
| H   | -2.85682000 | -3.73090000 | -0.70499700 |
| H   | -0.58627100 | -2.73044200 | -0.39825500 |
| H   | -4.47379500 | 0.24352700  | -0.52476700 |
| C   | -1.96051400 | 1.43018000  | -0.33367400 |
| N   | -0.69482200 | 1.53098900  | -0.13884100 |
| N   | -0.00173200 | 2.68304500  | -0.32433800 |
| C   | 1.27645100  | 2.43425000  | -0.73750300 |
| N   | 2.08676400  | 3.45905100  | -0.97796900 |
| H   | 1.76399600  | 4.41158300  | -0.95876300 |
| H   | 3.03270900  | 3.28552100  | -1.27417700 |
| N   | 1.54965000  | 1.16875500  | -0.86480400 |
| H   | 2.44874000  | 0.83072900  | -1.21462600 |
| N   | -1.28848000 | -0.81108500 | -0.32938900 |
| C   | -2.86897700 | 2.56490500  | -0.61112400 |
| H   | -3.71408900 | 2.25262000  | -1.22330100 |
| H   | -3.26513400 | 2.97884000  | 0.32171600  |
| H   | -2.33659900 | 3.36125400  | -1.13672600 |
| O   | 1.41068000  | -1.55229800 | -0.46408800 |
| C   | 2.58073100  | -1.69234900 | -1.03182300 |
| C   | 2.93575200  | -3.12594500 | -1.30777500 |
| H   | 3.93383900  | -3.19853500 | -1.73500800 |
| H   | 2.88107400  | -3.70547200 | -0.38362700 |
| H   | 2.20783200  | -3.55374200 | -2.00202200 |
| O   | 3.33929800  | -0.78002400 | -1.32617900 |
| Mn  | 0.45868400  | -0.03165500 | 0.12815700  |
| O   | 0.07415600  | -1.16110900 | 1.84235000  |
| C   | 0.53066600  | -0.20338100 | 2.50194300  |
| O   | 0.78591900  | 0.84823300  | 1.82209400  |
| C   | 0.81044900  | -0.26271300 | 3.95632400  |
| H   | 1.88188700  | -0.43500000 | 4.09514300  |

|   |             |             |            |
|---|-------------|-------------|------------|
| H | 0.56130900  | 0.68608400  | 4.43247700 |
| H | 0.26120700  | -1.08116800 | 4.41864100 |
| H | -0.31999500 | 3.55839700  | 0.06358600 |

St-2

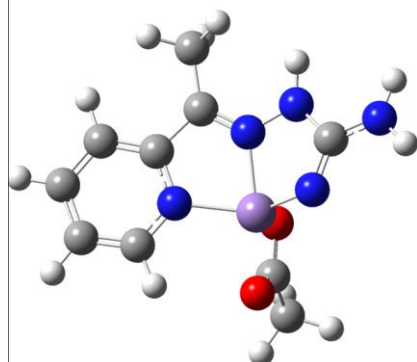

Energy= -916.039985 Hartree

|     |             |             |             |
|-----|-------------|-------------|-------------|
| 1 1 |             |             |             |
| C   | -3.95185400 | -0.66611700 | -0.16066900 |
| C   | -3.61627500 | 0.47877500  | -0.86411500 |
| C   | -2.27980800 | 0.80453200  | -1.01147000 |
| C   | -1.62660400 | -1.08948800 | 0.15823600  |
| C   | -2.94444400 | -1.46469000 | 0.35582600  |
| H   | -4.99026600 | -0.93912600 | -0.01561500 |
| H   | -4.37351900 | 1.12464100  | -1.28896300 |
| H   | -1.96648100 | 1.70133900  | -1.53182800 |
| H   | -3.17799400 | -2.36817100 | 0.90399500  |
| C   | -0.45923000 | -1.86053800 | 0.56831100  |
| N   | 0.61830900  | -1.23426800 | 0.24658900  |
| N   | 1.86840600  | -1.72003100 | 0.36945500  |
| C   | 2.69975400  | -1.01410000 | -0.48232100 |
| N   | 3.96858700  | -1.39861100 | -0.58545300 |
| H   | 4.37062500  | -2.09329600 | 0.02096700  |
| H   | 4.58442300  | -0.86854900 | -1.17996300 |
| N   | 2.14673300  | -0.01820800 | -1.11237900 |
| N   | -1.30800000 | 0.04775500  | -0.50293100 |
| C   | -0.51794300 | -3.19944500 | 1.20044300  |
| H   | -0.42296400 | -3.12022300 | 2.28785400  |
| H   | -1.46355200 | -3.69269100 | 0.97948700  |
| H   | 0.27943400  | -3.85340800 | 0.83913000  |
| O   | 0.27213200  | 2.51078400  | -0.56183700 |
| C   | 0.48461100  | 2.52584500  | 0.68933600  |
| C   | 0.50576600  | 3.78256900  | 1.46957000  |
| H   | 0.30797500  | 3.58959500  | 2.52272900  |
| H   | 1.50587700  | 4.21831000  | 1.37747500  |
| H   | -0.20911900 | 4.49574800  | 1.06014700  |
| O   | 0.70022300  | 1.39598300  | 1.23601700  |
| Mn  | 0.59721800  | 0.54859500  | -0.49817000 |
| H   | 2.02417300  | -2.68368600 | 0.63955000  |

St-3

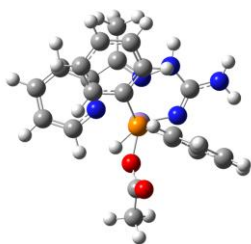

Energy= -1720.626700 Hartree

|     |             |             |             |
|-----|-------------|-------------|-------------|
| 1 1 |             |             |             |
| C   | 4.57677200  | -0.96310700 | -1.23457300 |
| C   | 3.74295200  | -1.98028100 | -1.66632300 |
| C   | 2.47987500  | -2.09344800 | -1.11298800 |
| C   | 2.85027800  | -0.26742400 | 0.25796400  |
| C   | 4.12521500  | -0.09491500 | -0.25484500 |
| H   | 5.57084900  | -0.84837900 | -1.65004400 |
| H   | 4.05812700  | -2.68729500 | -2.42236100 |
| H   | 1.79001600  | -2.87067400 | -1.41321900 |
| H   | 4.75547000  | 0.70401700  | 0.11309800  |
| C   | 2.28365300  | 0.51130000  | 1.34978000  |
| N   | 1.08766400  | 0.11927900  | 1.61126200  |
| N   | 0.37758400  | 0.54139100  | 2.68106000  |
| C   | -0.58788200 | -0.42291300 | 2.96147000  |
| N   | -1.31099300 | -0.25487500 | 4.07642500  |
| H   | -1.33178300 | 0.63252600  | 4.55053400  |
| H   | -2.07231700 | -0.89217700 | 4.24244900  |
| N   | -0.68380500 | -1.39337600 | 2.11986100  |
| N   | 2.03413900  | -1.25313900 | -0.17854800 |
| C   | 3.03924400  | 1.54911300  | 2.09231600  |
| H   | 3.75353200  | 1.09473200  | 2.78619700  |
| H   | 3.60330400  | 2.17517000  | 1.39933000  |
| H   | 2.37868900  | 2.20897100  | 2.65493400  |
| O   | -0.26770000 | -2.84727800 | -0.35832400 |
| C   | -1.28153900 | -3.09035600 | -1.15322200 |
| C   | -1.47960100 | -4.55005200 | -1.44352200 |
| H   | -2.34600200 | -4.69586600 | -2.08515400 |
| H   | -0.58925500 | -4.95644900 | -1.92986500 |
| H   | -1.61208000 | -5.09721600 | -0.50740900 |
| O   | -1.99046400 | -2.22398600 | -1.62872600 |
| Mn  | 0.18139500  | -1.32482800 | 0.57398200  |
| P   | -0.72144900 | 0.25010300  | -0.80281700 |
| C   | -2.47471500 | 0.68315400  | -0.62831000 |
| C   | -2.99020000 | 1.76719400  | -1.33795900 |
| C   | -3.31973600 | -0.08079500 | 0.17026300  |
| C   | -4.33614400 | 2.08225900  | -1.24367200 |
| H   | -2.34261200 | 2.36881400  | -1.96563600 |
| C   | -4.66476100 | 0.24191800  | 0.26554900  |
| H   | -2.92530900 | -0.93482000 | 0.70695200  |
| C   | -5.17428200 | 1.32148900  | -0.44033000 |
| H   | -4.73123600 | 2.92277700  | -1.80272600 |
| H   | -5.31803800 | -0.36051300 | 0.88651100  |
| H   | -6.22760600 | 1.56863300  | -0.36900000 |
| C   | 0.14721300  | 1.84094400  | -0.93122400 |
| C   | -0.04901300 | 2.85834600  | 0.00254500  |
| C   | 1.06122500  | 2.03387100  | -1.96551200 |

|   |             |             |             |
|---|-------------|-------------|-------------|
| C | 0.65425500  | 4.04782000  | -0.10230500 |
| H | -0.76858800 | 2.72696600  | 0.80394900  |
| C | 1.76890600  | 3.22364700  | -2.06484200 |
| H | 1.21150500  | 1.25616000  | -2.70785700 |
| C | 1.56582800  | 4.23172800  | -1.13436100 |
| H | 0.48320100  | 4.84018000  | 0.61801200  |
| H | 2.46936400  | 3.36751600  | -2.87985700 |
| H | 2.10748400  | 5.16703900  | -1.21936100 |
| H | 0.87148100  | 1.01304000  | 3.43020100  |
| H | -0.59339800 | -0.17582400 | -2.13639800 |

St-4

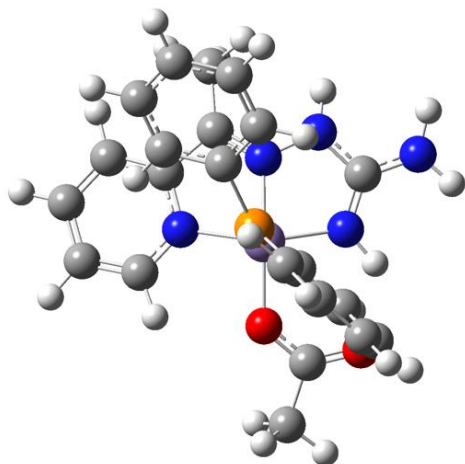

Energy= -1720.647516 Hartree

|     |             |             |             |
|-----|-------------|-------------|-------------|
| 1 1 |             |             |             |
| C   | 4.04550700  | -1.57966000 | -2.24122000 |
| C   | 2.86632900  | -2.02010300 | -2.82003500 |
| C   | 1.68233300  | -1.88161800 | -2.11701500 |
| C   | 2.78725500  | -0.90597600 | -0.32700100 |
| C   | 4.00751200  | -1.01858800 | -0.97569000 |
| H   | 4.98804900  | -1.67667100 | -2.76650800 |
| H   | 2.85406200  | -2.46623400 | -3.80614600 |
| H   | 0.72933600  | -2.20761500 | -2.51503400 |
| H   | 4.91455400  | -0.68120500 | -0.49191700 |
| C   | 2.61328300  | -0.41325000 | 1.03554700  |
| N   | 1.37344300  | -0.49504400 | 1.38987100  |
| N   | 0.94224200  | -0.29366800 | 2.66243600  |
| C   | -0.21997100 | -0.98775700 | 2.91816900  |
| N   | -0.64623400 | -1.03642400 | 4.17858300  |
| H   | -0.21268200 | -0.49207200 | 4.90517700  |
| H   | -1.53290200 | -1.46689900 | 4.38182700  |
| N   | -0.77530100 | -1.53884100 | 1.88237500  |
| N   | 1.63869600  | -1.33164300 | -0.90578700 |
| C   | 3.73331400  | 0.03369200  | 1.90286900  |
| H   | 4.19914200  | -0.81174700 | 2.42019200  |
| H   | 4.50570700  | 0.52207300  | 1.30808600  |
| H   | 3.40520400  | 0.76086800  | 2.64806400  |
| O   | -1.06255500 | -2.31624800 | -0.84231500 |
| C   | -2.09494700 | -3.02566900 | -0.50541400 |
| C   | -2.52712200 | -4.00558800 | -1.56416800 |
| H   | -3.36165600 | -4.60989200 | -1.21386400 |

|    |             |             |             |
|----|-------------|-------------|-------------|
| H  | -2.82302900 | -3.45960300 | -2.46357400 |
| H  | -1.69049800 | -4.65179700 | -1.83945700 |
| O  | -2.70467700 | -2.93879200 | 0.55737300  |
| Mn | 0.01641900  | -1.11666500 | 0.19223900  |
| P  | -0.55031000 | 0.79512200  | -0.39796100 |
| C  | -2.26856100 | 1.28983400  | -0.54311600 |
| C  | -2.63467800 | 2.51786200  | -1.10484100 |
| C  | -3.26832300 | 0.39344400  | -0.15070400 |
| C  | -3.97227900 | 2.84300900  | -1.25500000 |
| H  | -1.87454700 | 3.21766100  | -1.43126000 |
| C  | -4.60286900 | 0.72712700  | -0.30677600 |
| H  | -3.00205800 | -0.56839600 | 0.27376200  |
| C  | -4.95905000 | 1.95185100  | -0.85508700 |
| H  | -4.24526000 | 3.79690400  | -1.69197000 |
| H  | -5.36818100 | 0.02465600  | 0.00345000  |
| H  | -6.00504700 | 2.21059800  | -0.97480600 |
| C  | 0.44555000  | 2.29481300  | -0.32253100 |
| C  | 0.11918600  | 3.35215900  | 0.53183800  |
| C  | 1.60918200  | 2.37557500  | -1.08973000 |
| C  | 0.94195200  | 4.46327200  | 0.61318900  |
| H  | -0.78339800 | 3.30468100  | 1.13106100  |
| C  | 2.42805500  | 3.49205600  | -1.00776400 |
| H  | 1.86172200  | 1.56861900  | -1.76840100 |
| C  | 2.09684200  | 4.53555200  | -0.15572100 |
| H  | 0.67978800  | 5.27887800  | 1.27768600  |
| H  | 3.32165500  | 3.55079900  | -1.61905600 |
| H  | 2.73439000  | 5.41040500  | -0.09565700 |
| H  | 1.62824800  | -0.17958500 | 3.39594900  |
| H  | -1.64147800 | -2.06719600 | 1.96419400  |

St-5

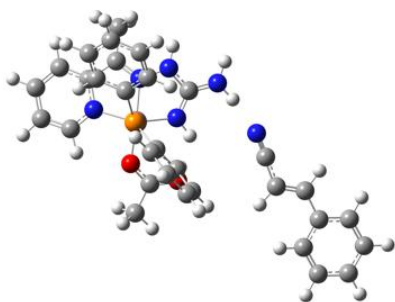

Energy= -2122.110598 Hartree

|     |            |             |             |
|-----|------------|-------------|-------------|
| l 1 |            |             |             |
| C   | 5.27702500 | -3.29299500 | -1.72616500 |
| C   | 4.38795600 | -2.86457200 | -2.69907000 |
| C   | 3.26699900 | -2.15216500 | -2.31269000 |
| C   | 3.86756900 | -2.29599800 | -0.07537700 |
| C   | 5.01283700 | -3.01008600 | -0.39684200 |
| H   | 6.16721000 | -3.84773000 | -1.99790200 |
| H   | 4.55657600 | -3.07022400 | -3.74825600 |
| H   | 2.53698500 | -1.78509800 | -3.02378500 |
| H   | 5.68658000 | -3.34800800 | 0.37939000  |
| C   | 3.41214200 | -1.99770200 | 1.27638000  |
| N   | 2.29932500 | -1.34188000 | 1.24479000  |

|    |              |             |             |
|----|--------------|-------------|-------------|
| N  | 1.55424100   | -1.09982800 | 2.35108700  |
| C  | 0.21567400   | -0.97495600 | 2.03817200  |
| N  | -0.65647800  | -0.90197400 | 3.02885700  |
| H  | -0.35759800  | -0.89495500 | 3.98919800  |
| H  | -1.65264900  | -0.79816900 | 2.82069200  |
| N  | -0.04367600  | -0.94459500 | 0.75874100  |
| N  | 3.01672200   | -1.86269700 | -1.03785800 |
| C  | 4.06610300   | -2.45462200 | 2.52720600  |
| H  | 3.47597300   | -3.23908900 | 3.01461800  |
| H  | 5.05636400   | -2.86180300 | 2.33901100  |
| H  | 4.17820600   | -1.62449300 | 3.23071200  |
| O  | 0.48920100   | -0.94827900 | -2.04408900 |
| C  | -0.78288600  | -0.88941000 | -2.28653200 |
| C  | -1.13856400  | -1.20530100 | -3.71685400 |
| H  | -2.21689000  | -1.18114300 | -3.86247900 |
| H  | -0.66386200  | -0.47686800 | -4.37901900 |
| H  | -0.75090800  | -2.18971400 | -3.98938600 |
| O  | -1.65305200  | -0.60183800 | -1.46989500 |
| Mn | 1.46318400   | -0.83495000 | -0.39576900 |
| P  | 2.29193600   | 1.07864000  | -0.38583200 |
| C  | 1.32656300   | 2.53761100  | -0.79165700 |
| C  | 1.93687600   | 3.78255400  | -0.97884900 |
| C  | -0.04966500  | 2.41319600  | -1.00534100 |
| C  | 1.18151100   | 4.87859200  | -1.36016300 |
| H  | 3.00495500   | 3.89396100  | -0.83262300 |
| C  | -0.79625000  | 3.51498300  | -1.38865900 |
| H  | -0.53742500  | 1.45369000  | -0.87208900 |
| C  | -0.18572000  | 4.74911400  | -1.56480400 |
| H  | 1.66511600   | 5.83843100  | -1.50317700 |
| H  | -1.86330200  | 3.40680100  | -1.54781400 |
| H  | -0.77361000  | 5.61001300  | -1.86275700 |
| C  | 3.73262700   | 1.63249100  | 0.54612900  |
| C  | 3.62306500   | 2.54438800  | 1.60017300  |
| C  | 4.98434800   | 1.09364100  | 0.24197500  |
| C  | 4.74308600   | 2.90544300  | 2.33058100  |
| H  | 2.65760500   | 2.97389300  | 1.84425800  |
| C  | 6.10386800   | 1.46081100  | 0.97394600  |
| H  | 5.08217000   | 0.39789300  | -0.58425400 |
| C  | 5.98475900   | 2.36515900  | 2.01922600  |
| H  | 4.64805200   | 3.61481300  | 3.14516500  |
| H  | 7.07358000   | 1.04780400  | 0.71954400  |
| H  | 6.86078600   | 2.65606800  | 2.58799300  |
| H  | 1.83037500   | -1.52076000 | 3.22871700  |
| H  | -1.00339000  | -0.84207800 | 0.43895800  |
| C  | -10.55849400 | -0.03076300 | -0.55115100 |
| C  | -9.40778000  | -0.03878100 | -1.33251000 |
| C  | -8.16501000  | -0.15825000 | -0.74173900 |
| C  | -8.04944400  | -0.27271200 | 0.64844700  |
| C  | -9.21468100  | -0.26340300 | 1.42124500  |
| C  | -10.45964300 | -0.14293200 | 0.82737000  |
| H  | -11.53107100 | 0.06427300  | -1.02047700 |
| H  | -9.48464700  | 0.04895000  | -2.41014500 |
| H  | -7.27980800  | -0.16167800 | -1.36717300 |
| H  | -9.13499100  | -0.35039600 | 2.50006400  |
| H  | -11.35343700 | -0.13697700 | 1.44045100  |

|   |             |             |             |
|---|-------------|-------------|-------------|
| C | -6.77663600 | -0.40007300 | 1.33379100  |
| C | -5.55464700 | -0.41843100 | 0.77509300  |
| C | -4.39404200 | -0.54452300 | 1.56816600  |
| N | -3.43310600 | -0.64578500 | 2.19677400  |
| H | -6.83786800 | -0.48805000 | 2.41524100  |
| H | -5.38337500 | -0.33881300 | -0.29280300 |

### St-6

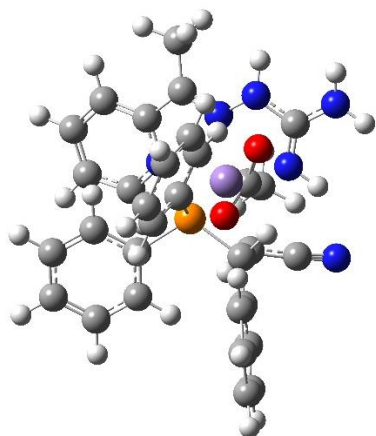

**Energy: -2122.097612 Hartree**

|     |            |             |             |
|-----|------------|-------------|-------------|
| 1 1 |            |             |             |
| C   | 3.33063600 | 3.24613600  | -1.64100800 |
| C   | 2.49078900 | 2.59393100  | -2.52156500 |
| C   | 1.87534200 | 1.41961100  | -2.11456700 |
| C   | 2.88914900 | 1.52047300  | -0.04708200 |
| C   | 3.53075900 | 2.70242900  | -0.38192500 |
| H   | 3.83209100 | 4.16351800  | -1.92505500 |
| H   | 2.30624700 | 2.97435400  | -3.51773900 |
| H   | 1.22347000 | 0.87155500  | -2.77986200 |
| H   | 4.18492500 | 3.19303500  | 0.32533400  |
| C   | 3.05184600 | 0.84021300  | 1.23650600  |
| N   | 2.30936900 | -0.20455000 | 1.33823800  |
| N   | 2.37190500 | -1.00133000 | 2.42907500  |
| C   | 1.72901600 | -2.20931100 | 2.24870600  |
| N   | 1.92980700 | -3.13741900 | 3.19403400  |
| H   | 2.34185100 | -2.89918100 | 4.07971400  |
| H   | 1.43956500 | -4.01399700 | 3.13447900  |
| N   | 1.00448000 | -2.30486500 | 1.19191900  |
| H   | 0.56024400 | -3.20607100 | 1.05879100  |
| N   | 2.06807700 | 0.88744300  | -0.91314800 |
| C   | 4.00406700 | 1.25590300  | 2.29764700  |
| H   | 4.83901000 | 0.54774100  | 2.35620000  |
| H   | 4.42710800 | 2.23993200  | 2.11594900  |
| H   | 3.50966800 | 1.27653800  | 3.27366100  |
| O   | 1.55314700 | -1.36807200 | -2.19145900 |
| C   | 2.62886100 | -1.96451500 | -1.89235900 |
| C   | 3.43165600 | -2.66865900 | -2.92854600 |
| H   | 3.30161200 | -2.20068000 | -3.90394000 |
| H   | 4.48439600 | -2.69048500 | -2.64871000 |
| H   | 3.07297300 | -3.70011800 | -2.99571600 |
| O   | 2.95708600 | -1.95343400 | -0.68052400 |
| Mn  | 1.23672400 | -0.87149700 | -0.23713100 |

|   |             |             |             |
|---|-------------|-------------|-------------|
| P | -0.73593700 | 0.36892100  | 0.27724100  |
| C | -1.24419900 | 1.15395800  | 1.84279200  |
| C | -2.39798600 | 1.93997500  | 1.89800500  |
| C | -0.52886800 | 0.92489900  | 3.01589500  |
| C | -2.82283500 | 2.47887800  | 3.10146700  |
| H | -2.96871600 | 2.13180200  | 0.99729100  |
| C | -0.95618100 | 1.46683500  | 4.21989800  |
| H | 0.36863100  | 0.32065600  | 2.99600300  |
| C | -2.10292000 | 2.24438500  | 4.26506700  |
| H | -3.72200500 | 3.08382600  | 3.12897700  |
| H | -0.39052800 | 1.28066500  | 5.12606500  |
| H | -2.43563600 | 2.66919400  | 5.20529700  |
| C | -1.24812500 | 1.58862300  | -0.96994900 |
| C | -1.92744200 | 1.24606400  | -2.13722200 |
| C | -0.86958800 | 2.92052600  | -0.77973500 |
| C | -2.22801500 | 2.21252300  | -3.08710900 |
| H | -2.24997600 | 0.22839500  | -2.30728000 |
| C | -1.17438300 | 3.88319400  | -1.72761600 |
| H | -0.34482200 | 3.21614500  | 0.12229500  |
| C | -1.85394200 | 3.53167500  | -2.88600200 |
| H | -2.76883600 | 1.92900200  | -3.98287500 |
| H | -0.88230800 | 4.91350900  | -1.55834200 |
| H | -2.09710200 | 4.28623400  | -3.62540600 |
| C | -5.84591600 | -1.59280400 | -0.77595800 |
| C | -4.91405100 | -1.96298700 | -1.73258100 |
| C | -3.55604900 | -1.83500900 | -1.47422700 |
| C | -3.10754800 | -1.33599800 | -0.25465900 |
| C | -4.05447000 | -0.98612000 | 0.70830000  |
| C | -5.40993000 | -1.10625100 | 0.44910500  |
| H | -6.90620900 | -1.69334800 | -0.97813500 |
| H | -5.24203400 | -2.36171900 | -2.68605300 |
| H | -2.84368700 | -2.14557100 | -2.23074400 |
| H | -3.72474100 | -0.62284400 | 1.67573600  |
| H | -6.12938000 | -0.82780900 | 1.21117400  |
| C | -1.64446100 | -1.21716400 | 0.06735000  |
| H | -1.46492500 | -1.67878900 | 1.04487900  |
| C | -0.58734100 | -1.74245600 | -0.89860300 |
| H | -0.70577900 | -1.34128500 | -1.90297900 |
| C | -0.45563800 | -3.16169200 | -0.96711000 |
| N | -0.30790800 | -4.30796700 | -0.93565900 |
| H | 3.20049800  | -0.96132600 | 3.00777600  |

### Cinnamonitrile

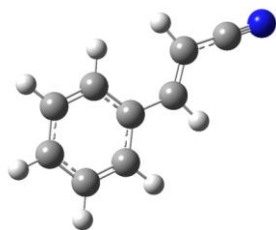

Energy= -401.464294 Hartree

|     |             |            |            |
|-----|-------------|------------|------------|
| 0 1 |             |            |            |
| C   | -3.12785200 | 0.19197700 | 0.00034800 |

|   |             |             |             |
|---|-------------|-------------|-------------|
| C | -2.27125100 | 1.28763000  | -0.00014000 |
| C | -0.90222000 | 1.10223000  | -0.00051300 |
| C | -0.35947800 | -0.18746900 | -0.00041700 |
| C | -1.23238200 | -1.27874200 | -0.00002700 |
| C | -2.60485500 | -1.09195600 | 0.00041600  |
| H | -4.20139500 | 0.34310600  | 0.00062600  |
| H | -2.67751700 | 2.29275000  | -0.00026900 |
| H | -0.24975000 | 1.96796300  | -0.00095100 |
| H | -0.82252100 | -2.28352700 | -0.00000700 |
| H | -3.26671400 | -1.95049700 | 0.00076800  |
| C | 1.07103900  | -0.44835500 | -0.00067300 |
| C | 2.05105700  | 0.46777700  | 0.00066000  |
| C | 3.41729600  | 0.09776100  | 0.00032700  |
| N | 4.53736300  | -0.17883000 | 0.00000100  |
| H | 1.35552900  | -1.49707600 | -0.00202000 |
| H | 1.85271000  | 1.53397400  | 0.00195500  |

### DiphenylPhosphine

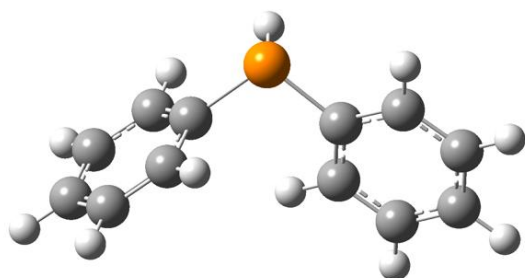

Energy= -804.591193 Hartree

0 1

|   |             |             |             |
|---|-------------|-------------|-------------|
| C | 3.67774600  | -1.22675300 | 0.00701500  |
| C | 3.78942400  | 0.09602700  | 0.40715400  |
| C | 2.67908800  | 0.92816400  | 0.36872000  |
| C | 1.45009900  | 0.45387800  | -0.08651800 |
| C | 1.34779400  | -0.87863600 | -0.48268300 |
| C | 2.45370200  | -1.71301300 | -0.43379700 |
| H | 4.54137300  | -1.88161900 | 0.04386900  |
| H | 4.73996900  | 0.48061900  | 0.76028000  |
| H | 2.76528300  | 1.95865900  | 0.69916400  |
| H | 0.39614600  | -1.26814700 | -0.82748200 |
| H | 2.36056600  | -2.74831300 | -0.74369800 |
| P | 0.05563000  | 1.64979700  | -0.12875400 |
| H | 0.01272200  | 1.85076300  | -1.53306600 |
| C | -1.42196800 | 0.58372100  | -0.02613600 |
| C | -1.81372300 | 0.10271800  | 1.22463200  |
| C | -2.21414300 | 0.28749800  | -1.13454800 |
| C | -2.95461000 | -0.67179200 | 1.35910900  |
| H | -1.21928000 | 0.33866200  | 2.10198700  |
| C | -3.36642600 | -0.47439700 | -0.99716600 |
| H | -1.92708500 | 0.65354200  | -2.11469300 |
| C | -3.73633200 | -0.95988900 | 0.24801700  |
| H | -3.24110900 | -1.04353300 | 2.33681600  |
| H | -3.97285300 | -0.69416000 | -1.86914900 |
| H | -4.63408600 | -1.55858900 | 0.35447600  |

3a'

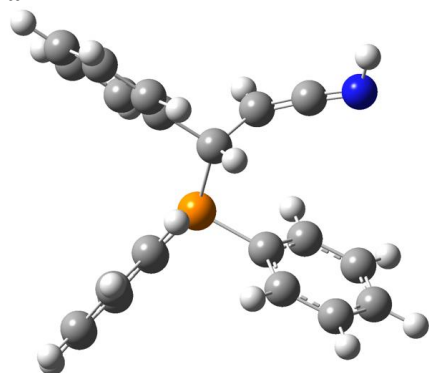

Energy= -1206.022892 Hartree

0 1

|   |             |             |             |
|---|-------------|-------------|-------------|
| C | -3.90038300 | -1.32169800 | 1.28442800  |
| C | -2.51656100 | -1.27336800 | 1.21310500  |
| C | -1.86894800 | -1.21053100 | -0.01934900 |
| C | -2.64342900 | -1.19932500 | -1.17601900 |
| C | -4.02803100 | -1.24830000 | -1.10756500 |
| C | -4.66210200 | -1.30888500 | 0.12445700  |
| H | -4.38645000 | -1.36770500 | 2.25287200  |
| H | -1.93204200 | -1.27812300 | 2.12744000  |
| H | -2.15457700 | -1.15732300 | -2.14453300 |
| H | -4.61268800 | -1.23841200 | -2.02106700 |
| H | -5.74428300 | -1.34523700 | 0.18105100  |
| C | -0.36116200 | -1.18942300 | -0.11625900 |
| C | 0.23346400  | -2.50999900 | 0.30065200  |
| H | 0.02177300  | -2.89013600 | 1.29515500  |
| C | 0.96632400  | -3.25290100 | -0.48656200 |
| N | 1.74482500  | -3.88777400 | -1.17837500 |
| P | 0.37006100  | 0.14913800  | 0.99321900  |
| C | -0.28303200 | 1.70460900  | 0.28237000  |
| C | -0.31531500 | 2.80463600  | 1.14081700  |
| C | -0.74427500 | 1.86819700  | -1.02328800 |
| C | -0.77565700 | 4.03744000  | 0.70395600  |
| H | 0.02277400  | 2.68861400  | 2.16596000  |
| C | -1.21830200 | 3.09731700  | -1.45863700 |
| H | -0.73900600 | 1.03377300  | -1.71445400 |
| C | -1.23136600 | 4.18552800  | -0.59799700 |
| H | -0.78812700 | 4.88098100  | 1.38542400  |
| H | -1.57901000 | 3.20471200  | -2.47591300 |
| H | -1.60220700 | 5.14543400  | -0.94008400 |
| C | 2.11347400  | 0.15013200  | 0.42468300  |
| C | 3.01245600  | -0.64824400 | 1.13357300  |
| C | 2.59154700  | 0.90151000  | -0.64795500 |
| C | 4.34722800  | -0.71625100 | 0.76393800  |
| H | 2.66152400  | -1.21942800 | 1.98683600  |
| C | 3.92935300  | 0.84418100  | -1.01013300 |
| H | 1.91782800  | 1.54636400  | -1.20086600 |
| C | 4.80908800  | 0.03136300  | -0.30939200 |
| H | 5.02928300  | -1.34858900 | 1.32160200  |
| H | 4.28572300  | 1.43836400  | -1.84477000 |
| H | 5.85431700  | -0.01332200 | -0.59490600 |

|   |             |             |             |
|---|-------------|-------------|-------------|
| H | -0.07424200 | -0.98969500 | -1.15145200 |
| H | 1.32849300  | -4.58886000 | -1.79088200 |

**3a**

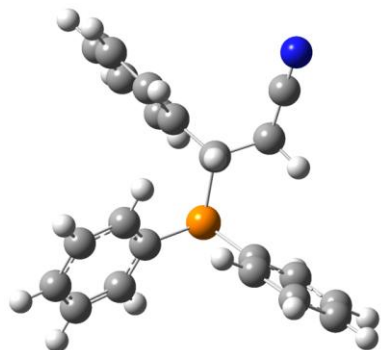

**Energy= -1206.057822 Hartree**

0 1

|   |             |             |             |
|---|-------------|-------------|-------------|
| C | 3.94515200  | -0.26536400 | -1.49407500 |
| C | 2.60340100  | -0.57346100 | -1.33232400 |
| C | 2.03646700  | -0.64098500 | -0.06028000 |
| C | 2.84958800  | -0.39705200 | 1.04309200  |
| C | 4.19271900  | -0.08978900 | 0.88352800  |
| C | 4.74468600  | -0.02103000 | -0.38652900 |
| H | 4.36760800  | -0.21446200 | -2.49154900 |
| H | 1.98711600  | -0.75557600 | -2.20686100 |
| H | 2.42875700  | -0.46025400 | 2.04157300  |
| H | 4.80953800  | 0.09270100  | 1.75650100  |
| H | 5.79416500  | 0.21985100  | -0.51353800 |
| C | 0.58498800  | -1.00531600 | 0.13108200  |
| C | 0.31434600  | -2.48442600 | -0.20422200 |
| H | 0.62149900  | -2.70988700 | -1.22938900 |
| C | 1.01604800  | -3.38648700 | 0.69335400  |
| N | 1.56102100  | -4.09239100 | 1.41920400  |
| P | -0.52279500 | 0.04132600  | -0.96284200 |
| C | -0.36581300 | 1.71498200  | -0.24105000 |
| C | -0.81346600 | 2.76350000  | -1.04718100 |
| C | 0.15147900  | 2.01808000  | 1.01702900  |
| C | -0.76852100 | 4.07458800  | -0.60057800 |
| H | -1.19967000 | 2.54631700  | -2.03846200 |
| C | 0.21041200  | 3.33206800  | 1.45963200  |
| H | 0.52127600  | 1.23258700  | 1.66451200  |
| C | -0.25338700 | 4.36234400  | 0.65543200  |
| H | -1.12607500 | 4.87432700  | -1.23972000 |
| H | 0.62200400  | 3.55003300  | 2.43910300  |
| H | -0.20650500 | 5.38813000  | 1.00375400  |
| C | -2.18247900 | -0.47816500 | -0.37121800 |
| C | -2.96424500 | -1.23616500 | -1.24279700 |
| C | -2.69525900 | -0.16278900 | 0.88715100  |
| C | -4.22181100 | -1.68443500 | -0.86169200 |
| H | -2.58345700 | -1.47141700 | -2.23182700 |
| C | -3.95210900 | -0.60600800 | 1.26718600  |
| H | -2.11454900 | 0.44532600  | 1.57239300  |
| C | -4.71664500 | -1.37020400 | 0.39456500  |
| H | -4.81725100 | -2.27321100 | -1.55071600 |

|   |             |             |             |
|---|-------------|-------------|-------------|
| H | -4.33947500 | -0.35143000 | 2.24770400  |
| H | -5.70074200 | -1.71386800 | 0.69349600  |
| H | -0.75418400 | -2.70639500 | -0.12795600 |
| H | 0.31144000  | -0.84925300 | 1.17854900  |

**'BuOK**

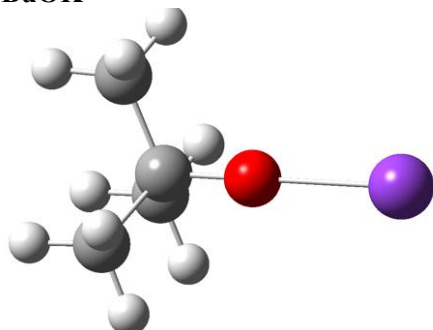

**Energy= -832.579172 Hartree**

|     |             |             |             |
|-----|-------------|-------------|-------------|
| 0 1 |             |             |             |
| C   | -1.07576700 | -0.00001100 | 0.00003300  |
| C   | -1.61679900 | -0.67662200 | -1.27106200 |
| H   | -1.25201300 | -0.14371600 | -2.15489500 |
| H   | -1.24839100 | -1.70606500 | -1.32434400 |
| H   | -2.71218200 | -0.70160800 | -1.31363600 |
| C   | -1.61768200 | -0.76204200 | 1.22135400  |
| H   | -1.25128000 | -1.79338200 | 1.20339900  |
| H   | -1.25145600 | -0.29223900 | 2.13972100  |
| H   | -2.71307600 | -0.78786600 | 1.26269200  |
| O   | 0.29004100  | -0.00033900 | 0.00056400  |
| K   | 2.57241200  | -0.00014700 | 0.00001900  |
| C   | -1.61612800 | 1.43923900  | 0.04916400  |
| H   | -2.71146800 | 1.48915100  | 0.05214200  |
| H   | -1.24795000 | 1.93918600  | 0.95069900  |
| H   | -1.25007900 | 1.99867400  | -0.81758200 |

**'BuOH**

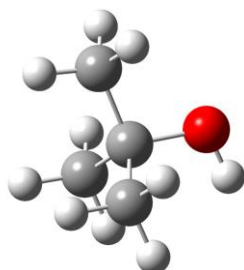

**Energy= -233.386007 Hartree**

|     |             |             |             |
|-----|-------------|-------------|-------------|
| 0 1 |             |             |             |
| C   | -0.00157800 | 0.01737800  | -0.00000000 |
| C   | -1.51395100 | 0.13846900  | 0.00000000  |
| H   | -1.85269000 | 0.68198700  | 0.88511400  |
| H   | -1.85269000 | 0.68198700  | -0.88511400 |
| H   | -1.98218700 | -0.84823000 | 0.00000000  |
| C   | 0.48356400  | -0.69955700 | -1.25251200 |
| H   | 0.15763800  | -0.16463400 | -2.14765800 |
| H   | 1.57689400  | -0.75683300 | -1.26759100 |

|   |            |             |             |
|---|------------|-------------|-------------|
| H | 0.09751500 | -1.72115200 | -1.30097700 |
| O | 0.48356400 | 1.36268000  | -0.00000000 |
| C | 0.48356400 | -0.69955700 | 1.25251200  |
| H | 0.09751500 | -1.72115200 | 1.30097700  |
| H | 1.57689400 | -0.75683300 | 1.26759100  |
| H | 0.15763800 | -0.16463400 | 2.14765800  |
| H | 1.44536000 | 1.32765000  | -0.00000000 |

**Pot. acetate**

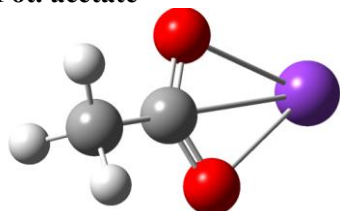

**Energy= -828.139132 Hartree**

|     |             |             |             |
|-----|-------------|-------------|-------------|
| 0 1 |             |             |             |
| C   | 0.98419100  | 0.00088900  | -0.01444300 |
| C   | 2.50185600  | -0.00022800 | 0.00508700  |
| H   | 2.89889100  | -0.88321600 | -0.49729100 |
| H   | 2.90203700  | 0.90811400  | -0.44658700 |
| H   | 2.83501400  | -0.03225300 | 1.04736800  |
| O   | 0.40039400  | 1.11609100  | -0.00849500 |
| O   | 0.40088500  | -1.11470800 | -0.00853200 |
| K   | -1.89276100 | -0.00040400 | 0.00467700  |

8. ORTEP diagrams:

C1

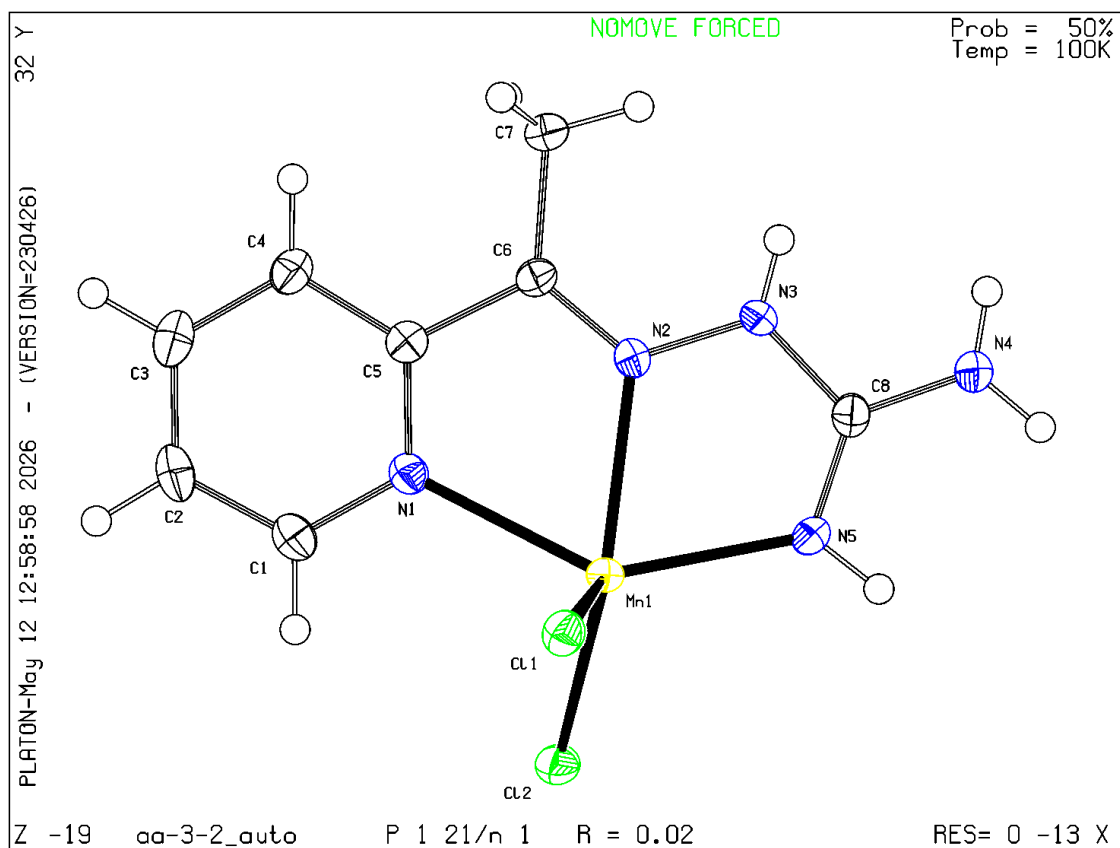

C2

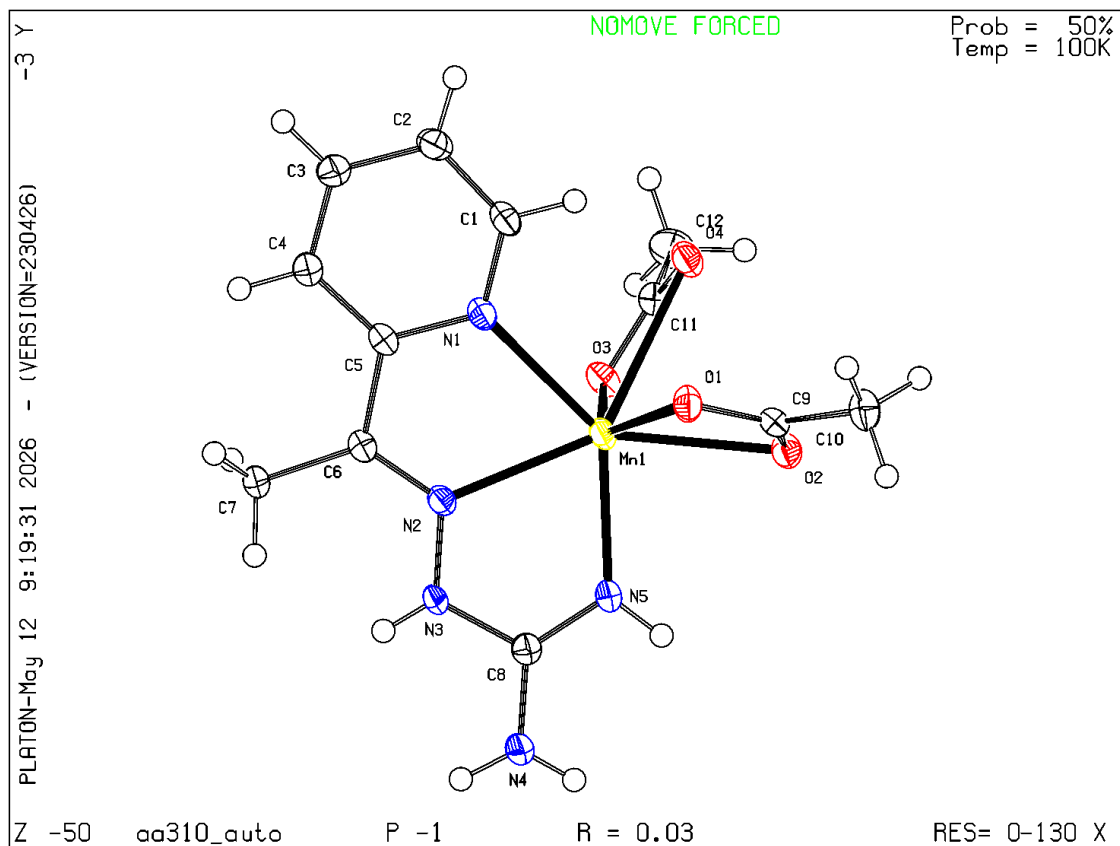

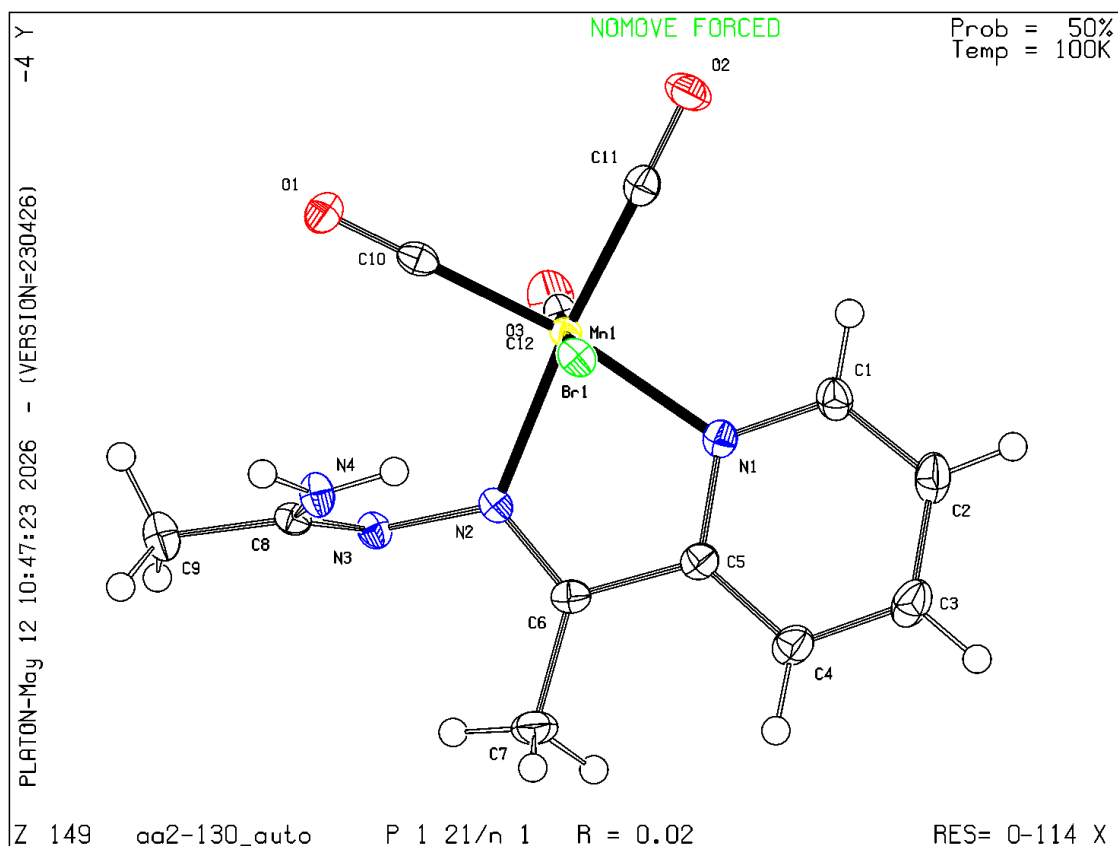

## 9.0 References:

1. M. J. Frisch, G. W. Trucks, H. B. Schlegel, G. E. Scuseria, M. A. Robb, J. R. Cheeseman, G. Scalmani, V. Barone, G. A. Petersson, H. Nakatsuji, X. Li, M. Caricato, A. V. Marenich, J. Bloino, B. G. Janesko, R. Gomperts, B. Mennucci, H. P. Hratchian, J. V. Ortiz, A. F. Izmaylov, J. L. Sonnenberg, D. Williams-Young, F. Ding, F. Lipparini, F. Egidi, J. Goings, B. Peng, A. Petrone, T. Henderson, D. Ranasinghe, V. G. Zakrzewski, J. Gao, N. Rega, G. Zheng, W. Liang, M. Hada, M. Ehara, K. Toyota, R. Fukuda, J. Hasegawa, M. Ishida, T. Nakajima, Y. Honda, O. Kitao, H. Nakai, T. Vreven, K. Throssell, J. A. Montgomery, Jr., J. E. Peralta, F. Ogliaro, M. J. Bearpark, J. J. Heyd, E. N. Brothers, K. N. Kudin, V. N. Staroverov, T. A. Keith, R. Kobayashi, J. Normand, K. Raghavachari, A. P. Rendell, J. C. Burant, S. S. Iyengar, J. Tomasi, M. Cossi, J. M. Millam, M. Klene, C. Adamo, R. Cammi, J. W. Ochterski, R. L. Martin, K. Morokuma, O. Farkas, J. B. Foresman, and D. J. Fox, Gaussian 16, Revision C.01, Gaussian, Inc., Wallingford CT, **2016**.

2. a) S. Grimme, S. Ehrlich and L. Goerigk, *J. Comput. Chem.*, 2011, **32**, 1456–1465; b) C. Adamo and V. Barone, *J. Chem. Phys.*, 1999, **110**, 6158–6170.
3. a) F. Weigend, *Phys. Chem. Chem. Phys.*, 2006, **8**, 1057–1065; b) F. Weigend and R. Ahlrichs, *Phys. Chem. Chem. Phys.*, 2005, **7**, 3297–3305.
4. a) P. J. Hay and W. R. Wadt, *J. Chem. Phys.*, 1985, **82**, 299–310; b) W. R. Wadt and P. J. Hay, *J. Chem. Phys.*, 1985, **82**, 284–298; c) P. J. Hay and W. R. Wadt, *J. Chem. Phys.*, 1985, **82**, 270–283.
5. A. V. Marenich, C. J. Cramer and D. G. Truhlar, *Phys. Chem. Chem. Phys. B*, 2009, **113**, 6378–6396.
6. A. A. Wani, J. J. G. Carballo, H. Jayaprakash, M. Wörle, A. Widera, A. Togni and H. Grützmacher, *Chem. Eur. J.*, 2024, **30**, e202303848.
7. CrysAlisPro 1.171.44.140a (Rigaku Oxford Diffraction, 2026)
8. Sheldrick, G.M. (2015). *Acta Cryst. A*71, 3-8.
9. Sheldrick, G.M. (2015). *Acta Cryst. C*71, 3-8.
10. Dolomanov, O.V., Bourhis, L.J., Gildea, R.J., Howard, J.A.K. & Puschmann, H. (2009), *J. Appl. Cryst.* 42, 339-341.
